# Supplementary material for: Evaluation of halogen bonding proclivity of oxazole derivatives carrying multiple acceptor sites in cocrystals with perfluorinated iodobenzenes
Source: Royal Society of Chemistry journal article supplement (doi:10.1039/d4ce00557k), 2024-01-01
Supplement: d4ce00557k1.pdf [file d4ce00557k1.pdf]

## SUPPORTING INFORMATION

# Evaluation of halogen bonding proclivity of oxazole derivatives carrying multiple acceptor sites in cocrystals with perfluorinated iodobenzenes

Ruđer Sušanji, Nikola Bedeković, Sara Cerovski, Nea Baus Topić, Vinko Nemec\*  
and Dominik Cinčić\*

Department of Chemistry, Faculty of Science, University of Zagreb, Horvatovac 102a,  
HR-10000 Zagreb, Croatia

E-mail: vnemec@chem.pmf.hr, dominik@chem.pmf.hr

Fax: +385 1 4606 341

Tel: +385 1 4606 362, +385 1 4606 379

### Table of Contents

|                      |                                                                                                                                                                                                                                 |    |
|----------------------|---------------------------------------------------------------------------------------------------------------------------------------------------------------------------------------------------------------------------------|----|
| Experimental details | Preparation of acceptors, solution syntheses of cocrystals and crystal bulks, thermal analysis, powder and single crystal X-ray diffraction experiments, computational details                                                  | 5  |
| Table S1.            | Crystal data and refinement details for the prepared cocrystals.                                                                                                                                                                | 10 |
| Figure S1.           | Partial molecular structure of <b>(tfox)<sub>2</sub>(14tfib)</b> showing the atom-labelling scheme. Displacement ellipsoids are drawn at the 50 % probability level, and H atoms are shown as small spheres of arbitrary radius | 19 |
| Figure S2.           | Partial molecular structure of <b>(tfox)(135tfib)</b> showing the atom-labelling scheme. Displacement ellipsoids are drawn at the 50 % probability level, and H atoms are shown as small spheres of arbitrary radius            | 19 |
| Figure S3.           | Partial molecular structure of <b>(fox)(14tfib)</b> showing the atom-labelling scheme. Displacement ellipsoids are drawn at the 50 % probability level, and H atoms are shown as small spheres of arbitrary radius              | 20 |
| Figure S4.           | Partial molecular structure of <b>(fox)(135tfib)</b> showing the atom-labelling scheme. Displacement ellipsoids are drawn at the 50 % probability level, and H atoms are shown as small spheres of arbitrary radius             | 20 |
| Figure S5.           | Partial molecular structure of <b>(pox)(14tfib)</b> showing the atom-labelling scheme. Displacement ellipsoids are drawn at the 50 % probability level, and H atoms are shown as small spheres of arbitrary radius.             | 21 |
| Figure S6.           | Partial molecular structure of <b>(pox)(135tfib)</b> showing the atom-labelling scheme. Displacement ellipsoids are drawn at the 50 % probability level, and H atoms are shown as small spheres of arbitrary radius.            | 21 |
| Figure S7.           | Partial molecular structure of <b>(pox)(13tfib)</b> showing the atom-labelling scheme. Displacement ellipsoids are drawn at the 50 % probability level, and H atoms are shown as small spheres of arbitrary radius.             | 22 |
| Figure S8.           | Partial molecular structure of <b>(pox)(12tfib)<sub>2</sub></b> showing the atom-labelling scheme.                                                                                                                              | 22 |

|             |                                                                                                                                                                                                                          |    |
|-------------|--------------------------------------------------------------------------------------------------------------------------------------------------------------------------------------------------------------------------|----|
|             | Displacement ellipsoids are drawn at the 50 % probability level, and H atoms are shown as small spheres of arbitrary radius.                                                                                             |    |
| Figure S9.  | Partial molecular structure of <b>(tolox)(14tfib)</b> showing the atom-labelling scheme. Displacement ellipsoids are drawn at the 50 % probability level, and H atoms are shown as small spheres of arbitrary radius.    | 23 |
| Figure S10. | Partial molecular structure of <b>(tolox)(135tfib)</b> showing the atom-labelling scheme. Displacement ellipsoids are drawn at the 50 % probability level, and H atoms are shown as small spheres of arbitrary radius.   | 23 |
| Figure S11. | Molecular structure of <b>nox</b> showing the atom-labelling scheme. Displacement ellipsoids are drawn at the 50 % probability level, and H atoms are shown as small spheres of arbitrary radius.                        | 24 |
| Figure S12. | Molecular structure of <b>(nox)(14tfib)</b> showing the atom-labelling scheme. Displacement ellipsoids are drawn at the 50 % probability level, and H atoms are shown as small spheres of arbitrary radius.              | 24 |
| Figure S13. | Molecular structure of <b>(nox)(135tfib)</b> showing the atom-labelling scheme. Displacement ellipsoids are drawn at the 50 % probability level, and H atoms are shown as small spheres of arbitrary radius.             | 24 |
| Figure S14. | Molecular structure of <b>(phox)(14tfib)</b> showing the atom-labelling scheme. Displacement ellipsoids are drawn at the 50 % probability level, and H atoms are shown as small spheres of arbitrary radius.             | 25 |
| Figure S15. | Molecular structure of <b>(phox)(135tfib)</b> showing the atom-labelling scheme. Displacement ellipsoids are drawn at the 50 % probability level, and H atoms are shown as small spheres of arbitrary radius.            | 25 |
| Figure S16. | Molecular structure of <b>(phox)(12tfib)<sub>2</sub></b> showing the atom-labelling scheme. Displacement ellipsoids are drawn at the 50 % probability level, and H atoms are shown as small spheres of arbitrary radius. | 26 |
| Figure S17. | Molecular structure of <b>(phox)(13tfib)</b> showing the atom-labelling scheme. Displacement ellipsoids are drawn at the 50 % probability level, and H atoms are shown as small spheres of arbitrary radius.             | 26 |
| Figure S18. | Molecular structure of <b>box</b> showing the atom-labelling scheme. Displacement ellipsoids are drawn at the 50 % probability level, and H atoms are shown as small spheres of arbitrary radius.                        | 27 |
| Figure S19. | Molecular structure of <b>(box)(14tfib)</b> showing the atom-labelling scheme. Displacement ellipsoids are drawn at the 50 % probability level, and H atoms are shown as small spheres of arbitrary radius.              | 27 |
| Figure S20. | Molecular structure of <b>(box)(12tfib)</b> showing the atom-labelling scheme. Displacement ellipsoids are drawn at the 50 % probability level, and H atoms are shown as small spheres of arbitrary radius.              | 27 |
| Figure S21. | Molecular structure of <b>(box)<sub>3</sub>(135tfib)</b> showing the atom-labelling scheme. Displacement ellipsoids are drawn at the 50 % probability level, and H atoms are shown as small spheres of arbitrary radius. | 28 |
| Table S2.   | Melting / decomposition temperatures of prepared cocrystals or crystal phases obtained by cocrystallized reactants in determined stoichiometry                                                                           | 29 |
| Figure S22. | DSC curve of <b>(tfox)<sub>2</sub>(14tfib)</b>                                                                                                                                                                           | 30 |
| Figure S23. | DSC curve of <b>(tfox)(135tfib)</b>                                                                                                                                                                                      | 30 |
| Figure S24. | DSC curve of or crystal phase obtained by cocrystallized <b>fox</b> and <b>14tfib</b> in their respective stoichiometry                                                                                                  | 31 |
| Figure S25. | DSC curve of or crystal phase obtained by cocrystallized <b>fox</b> and <b>135tfib</b> in their respective stoichiometry                                                                                                 | 31 |

|             |                                                                                                                                                              |    |
|-------------|--------------------------------------------------------------------------------------------------------------------------------------------------------------|----|
| Figure S26. | DSC curve of or crystal phase obtained by cocrystallized <b>pox</b> and <b>14tfib</b> in their respective stoichiometry                                      | 32 |
| Figure S27. | DSC curve of or crystal phase obtained by cocrystallized <b>pox</b> and <b>135tfib</b> in their respective stoichiometry                                     | 32 |
| Figure S28. | DSC curve of or crystal phase obtained by cocrystallized <b>pox</b> and <b>12tfib</b> in their respective stoichiometry.                                     | 33 |
| Figure S29. | DSC curve of or crystal phase obtained by cocrystallized <b>pox</b> and <b>13tfib</b> in their respective stoichiometry.                                     | 33 |
| Figure S30. | DSC curve of or crystal phase obtained by cocrystallized <b>tolox</b> and <b>14tfib</b> in their respective stoichiometry.                                   | 34 |
| Figure S31. | DSC curve of or crystal phase obtained by cocrystallized <b>nox</b> and <b>14tfib</b> in their respective stoichiometry.                                     | 34 |
| Figure S32. | DSC curve of or crystal phase obtained by cocrystallized <b>nox</b> and <b>135tfib</b> in their respective stoichiometry.                                    | 35 |
| Figure S33. | DSC curve of <b>(phox)(14tfib)</b> .                                                                                                                         | 35 |
| Figure S34. | DSC curve of <b>(phox)(135tfib)</b> .                                                                                                                        | 36 |
| Figure S35. | DSC curve of or crystal phase obtained by cocrystallized <b>phox</b> and <b>12tfib</b> in their respective stoichiometry                                     | 36 |
| Figure S36. | DSC curve of or crystal phase obtained by cocrystallized <b>phox</b> and <b>13tfib</b> in their respective stoichiometry                                     | 37 |
| Figure S37. | DSC curve of or crystal phase obtained by cocrystallized <b>box</b> and <b>14tfib</b> in their respective stoichiometry                                      | 37 |
| Figure S38. | DSC curve of or crystal phase obtained by cocrystallized <b>box</b> and <b>135tfib</b> in their respective stoichiometry                                     | 38 |
| Figure S39. | DSC curve of or crystal phase obtained by cocrystallized <b>box</b> and <b>12tfib</b> in their respective stoichiometry                                      | 38 |
| Figure S40. | Calculated PXRD pattern from <b>(tfox)<sub>2</sub>(14tfib)</b> single crystal data (blue) and diffractogram of the product obtained by crystallization (red) | 39 |
| Figure S41. | Calculated PXRD pattern from <b>(tfox)(135tfib)</b> single crystal data (blue) and diffractogram of the product obtained by crystallization (red)            | 39 |
| Figure S42. | Calculated PXRD pattern from <b>(fox)(14tfib)</b> single crystal data (blue) and diffractogram of the product obtained by crystallization (red)              | 40 |
| Figure S43. | Calculated PXRD pattern from <b>(fox)(135tfib)</b> single crystal data (blue) and diffractogram of the product obtained by crystallization (red)             | 40 |
| Figure S44. | Calculated PXRD pattern from <b>(pox)(14tfib)</b> single crystal data (blue) and diffractogram of the product obtained by crystallization (red)              | 41 |
| Figure S45. | Calculated PXRD pattern from <b>(pox)(135tfib)</b> single crystal data (blue) and diffractogram of the product obtained by crystallization (red)             | 41 |
| Figure S46. | Calculated PXRD pattern from <b>(pox)(12tfib)<sub>2</sub></b> single crystal data (blue) and diffractogram of the product obtained by crystallization (red)  | 42 |
| Figure S47. | Calculated PXRD pattern from <b>(tolox)(14tfib)</b> single crystal data (blue) and diffractogram of the product obtained by crystallization (red)            | 42 |
| Figure S48. | Calculated PXRD pattern from <b>(nox)(14tfib)</b> single crystal data (blue) and diffractogram of the product obtained by crystallization (red)              | 43 |
| Figure S49. | Calculated PXRD pattern from <b>(nox)(135tfib)</b> single crystal data (blue) and diffractogram of the product obtained by crystallization (red)             | 43 |

|             |                                                                                                                                                                         |    |
|-------------|-------------------------------------------------------------------------------------------------------------------------------------------------------------------------|----|
| Figure S50. | Calculated PXRD pattern from ( <b>phox</b> )( <b>14tfib</b> ) single crystal data (blue) and diffractogram of the product obtained by crystallization (red)             | 44 |
| Figure S51. | Calculated PXRD pattern from ( <b>phox</b> )( <b>135tfib</b> ) single crystal data (blue) and diffractogram of the product obtained by crystallization (red)            | 44 |
| Figure S52. | Calculated PXRD pattern from ( <b>box</b> )( <b>12tfib</b> ) <sub>2</sub> single crystal data (blue) and diffractogram of the product obtained by crystallization (red) | 45 |
| Table S3.   | Halogen bond energies between <b>14tfib</b> (model XB donor) and different acceptor sites on oxazoles used in study. Energies are BSSE corrected.                       | 46 |
| Figure S53. | Optimized halogen-bonded trimer ( <b>14tfib</b> )( <b>fox</b> ) <sub>2</sub> including I⋯N and I⋯O <sub>ox</sub> halogen bonds.                                         | 46 |
| Figure S54. | Optimized halogen-bonded trimer ( <b>14tfib</b> )( <b>fox</b> ) <sub>2</sub> including I⋯N and I⋯O <sub>fur</sub> halogen bonds.                                        | 46 |
| Figure S55. | Optimized halogen-bonded trimer ( <b>14tfib</b> )( <b>pox</b> ) <sub>2</sub> including I⋯N and I⋯O <sub>ox</sub> halogen bonds.                                         | 46 |
| Figure S56. | Optimized halogen-bonded trimer ( <b>14tfib</b> )( <b>pox</b> ) <sub>2</sub> including I⋯N and I⋯N <sub>py</sub> halogen bonds.                                         | 47 |
| Figure S57. | Optimized halogen-bonded trimer ( <b>14tfib</b> )( <b>tfox</b> ) <sub>2</sub> including I⋯N and I⋯O <sub>ox</sub> halogen bonds.                                        | 47 |
| Figure S58. | Optimized halogen-bonded trimer ( <b>14tfib</b> )( <b>box</b> ) <sub>2</sub> including I⋯N and I⋯O <sub>ox</sub> halogen bonds.                                         | 47 |
| Figure S59. | Optimized halogen-bonded trimer ( <b>14tfib</b> )( <b>box</b> ) <sub>2</sub> including I⋯N and I⋯π halogen bonds.                                                       | 47 |
| Figure S60. | Optimized halogen-bonded trimer ( <b>14tfib</b> )( <b>nox</b> ) <sub>2</sub> including I⋯N and I⋯O <sub>ox</sub> halogen bonds.                                         | 47 |
| Figure S61. | Optimized halogen-bonded trimer ( <b>14tfib</b> )( <b>nox</b> ) <sub>2</sub> including I⋯N and I⋯NO <sub>2</sub> halogen bonds.                                         | 48 |
| Figure S62. | Optimized halogen-bonded trimer ( <b>14tfib</b> )( <b>tox</b> ) including I⋯N halogen bond.                                                                             | 48 |
| Figure S63. | Optimized halogen-bonded trimer ( <b>14tfib</b> )( <b>phox</b> ) <sub>2</sub> including I⋯N and I⋯O <sub>ox</sub> halogen bonds.                                        | 48 |

## EXPERIMENTAL DETAILS

### SYNTHESES OF ACCEPTORS

Acceptors have been synthesized by general procedure described in main text.

Exact equimolar amounts of aldehydes used are as follows:

| Acceptor     | Aldehyde                  | Volume used / $\mu\text{L}$ |
|--------------|---------------------------|-----------------------------|
| <b>tfox</b>  | 3-thiophenecarboxaldehyde | 934                         |
| <b>fox</b>   | 3-furancarboxaldehyde     | 866                         |
| <b>pox</b>   | 3-pyridinecarboxaldehyde  | 940                         |
| <b>tolox</b> | 4-methylbenzaldehyde      | 1180                        |
| <b>nox</b>   | 4-nitrobenzaldehyde       | 977                         |
| <b>phox</b>  | benzaldehyde              | 1020                        |

### COCRYSTALLIZATION

#### Cocrystal of (tfox)<sub>2</sub>(14tfib)

**14tfib** (40.1 mg, 0.100 mmol) was dissolved in a solvent mixture of 2.0 mL diethyl-ether and 2.0 mL of hexane followed by addition of 100  $\mu\text{L}$  aliquot of **tfox** (sln,  $c \approx 1 \text{ mol dm}^{-3}$ ). The solution was left to crystallize at room temperature.

#### Cocrystal of (tfox)(135tfib)

**135tfib** (50.1 mg, 0.100 mmol) was dissolved in a 2.0 mL of ethyl-acetate, followed by addition of 100  $\mu\text{L}$  aliquot of **tfox** (sln,  $c \approx 1 \text{ mol dm}^{-3}$ ). The solution was left to crystallize at room temperature.

#### Cocrystal of (fox)(14tfib)

**14tfib** (20.1 mg, 0.050 mmol) was dissolved in a solution mixture of 2.0 mL methyl-*tert*-butyl ether and 1.00 mL of methanol, followed by addition of 50  $\mu\text{L}$  aliquot of **fox** (sln,  $c \approx 1 \text{ mol dm}^{-3}$ ). The solution was left to crystallize in partially closed vial at room temperature.

#### Cocrystal of (fox)(135tfib)

**135tfib** (51.0 mg, 0.100 mmol) was dissolved in a 2.0 mL of dichloromethane followed by addition of 100  $\mu\text{L}$  aliquot of **fox** (sln,  $c \approx 1 \text{ mol dm}^{-3}$ ). The solution was left to crystallize at room temperature.

#### Cocrystal of (pox)(14tfib)

**14tfib** (40.1 mg, 0.100 mmol) was dissolved in 2.0 mL of chloroform, followed by addition of 100  $\mu\text{L}$  aliquot of **pox** (sln,  $c \approx 1 \text{ mol dm}^{-3}$ ). The solution was left to crystallize at room temperature.

#### Cocrystal of (pox)(135tfib)

**135tfib** (51.0 mg, 0.100 mmol) was dissolved in in 2.0 mL of chloroform, followed by addition of 100  $\mu\text{L}$  aliquot of **pox** (sln,  $c \approx 1 \text{ mol dm}^{-3}$ ). The solution was left to crystallize at room temperature.

#### Cocrystal of (pox)(12tfib)<sub>2</sub>

**12tfib** (40.1 mg, 0.100 mmol) was dissolved in a solvent mixture of 1.0 mL methanol and 1.0 mL acetonitrile, followed by addition of 100  $\mu\text{L}$  aliquot of **pox** (sln,  $c \approx 1 \text{ mol dm}^{-3}$ ). The solution was left to crystallize at room temperature.

#### Cocrystal of (pox)(13tfib)

**13tfib** (15  $\mu\text{L}$ , 0.100 mmol) was dissolved in 2.00 mL of methyl-tert-butyl ether, followed by addition of 100  $\mu\text{L}$  aliquot of **pox** (sln,  $c \approx 1 \text{ mol dm}^{-3}$ ). The solution was left to crystallize at room temperature.

#### Cocrystal of (tolox)(14tfib)

**14tfib** (40.1 mg, 0.100 mmol) was dissolved in a solvent mixture of 1.0 mL methanol and 1.0 mL acetonitrile followed by addition of 300  $\mu\text{L}$  aliquot of **tolox** (sln,  $c \approx 0.5 \text{ mol dm}^{-3}$ ). The solution was left to crystallize at room temperature.

#### Cocrystal of (tolox)(135tfib)

**135tfib** (25.5 mg, 0.050 mmol) was dissolved in a solvent mixture of 1.0 mL methanol and 1.0 mL acetonitrile followed by addition of 300  $\mu\text{L}$  aliquot of **tolox** (sln,  $c \approx 0.5 \text{ mol dm}^{-3}$ ). The solution was left to crystallize at room temperature.

#### Cocrystal of (phox)(14tfib)

**14tfib** (40.1 mg, 0.100 mmol) was dissolved in a solvent mixture of 1.0 mL ethanol and 1.0 mL methyl *tert*-butyl ether followed by addition of 100  $\mu$ L aliquot of **phox** (sln,  $c \approx 1.0 \text{ mol dm}^{-3}$ ). The solution was left to crystallize at room temperature.

#### Cocrystal of (phox)(135tfib)

**135tfib** (51.0 mg, 0.100 mmol) was dissolved in a solvent mixture of 1.0 mL chloroform and 1.00 mL hexane followed by addition of 100  $\mu$ L aliquot of **phox** (sln,  $c \approx 1.0 \text{ mol dm}^{-3}$ ). The solution was left to crystallize at room temperature.

#### Cocrystal of (phox)(12tfib)<sub>2</sub>

**12tfib** (40.1 mg, 0.100 mmol) was dissolved in a solvent mixture of 2.00 mL methanol followed by addition of 100  $\mu$ L aliquot of **phox** (sln,  $c \approx 1 \text{ mol dm}^{-3}$ ). The solution was left to crystallize at 4 °C.

#### Cocrystal of (phox)(13tfib)

**13tfib** (15  $\mu$ L, 0.100 mmol) was dissolved in 1 mL diethyl ether and 1 mL of hexane, followed by addition of 100  $\mu$ L aliquot of **phox** (sln,  $c \approx 1 \text{ mol dm}^{-3}$ ). The solution was left to crystallize at 4 °C.

#### Cocrystal of (nox)(14tfib)

A mixture containing **nox** (19.0 mg, 0.100 mol) and **14tfib** (40.1 mg, 0.100 mol) was dissolved in 4.00 mL of ethanol. The solution was left to crystallize at room temperature.

#### Cocrystal of (nox)(135tfib)

A mixture containing **nox** (19.0 mg, 0.100 mol) and **14tfib** (40.1 mg, 0.100 mol) was dissolved in a solvent mixture of 2.0 mL chloroform and 2.0 mL of hexane. The solution was left to crystallize at room temperature.

#### Cocrystal of (box)(14tfib)

**14tfib** (40.1 mg, 0.100 mmol) was dissolved in 2.0 mL of methanol followed by addition of 100  $\mu$ L of melted **box**. The solution was left to crystallize at 4 °C.

### Cocrystal of (box)<sub>3</sub>(135tfib)

**135tfib** (51.0 mg, 0.100 mmol) was dissolved in 2.0 mL methanol followed by addition of 100  $\mu$ L of melted **box**. The solution was left to crystallize at 4 °C.

### Cocrystal of (box)(12tfib)

**12tfib** (40.1 mg, 0.100 mmol) was dissolved in 2.0 mL of methanol followed by addition of 100  $\mu$ L of melted **box**. The solution was left to crystallize at 4 °C.

## THERMAL ANALYSIS

DSC measurements were performed on a Mettler-Toledo DSC823e instrument. The samples were placed in sealed aluminium pans (40  $\mu$ L) with a pinhole made in the top cover, and heated in flowing nitrogen (150 mL min<sup>-1</sup>) from -10 °C to 300 °C for (fox)(14tfib), (fox)(135tfib), (box)(14tfib), (box)<sub>3</sub>(135tfib), (phox)(12tfib)<sub>2</sub> and (phox)(13tfib); from 25 °C to -15 °C and then to 100 °C at two steps for **box** and from 25 °C to 300 °C for the rest of the samples, all at a rate of 10 °C min<sup>-1</sup>. Data collection and analysis were performed using the program package STAR<sup>e</sup> Software 17.00.<sup>1</sup>

## POWDER X-RAY DIFFRACTION EXPERIMENTS

PXRD experiments were performed on a Malvern PANalytical *Aeris* X-ray diffractometer with CuK $\alpha$ <sub>1</sub> (1.54056 Å) radiation at 15 mA and 40 kV. The scattered intensities were measured with a line (1D) detector. The angular range was from 5 to 40° (2 $\theta$ ) with an interpolated step size of 0.00543322°. Data analysis was performed using the program *Data Viewer*.<sup>3</sup>

## SINGLE-CRYSTAL X-RAY DIFFRACTION EXPERIMENTS

The crystal and molecular structures of the prepared cocrystals were determined by single crystal X-ray diffraction. Details of data collection and crystal structure refinement are listed in Table S1, S2, S3 and S4. Diffraction measurements were made on and Rigaku Synergy XtaLAB X-ray diffractometer with graphite-monochromated MoK $\alpha$  ( $\lambda$  = 0.71073Å) radiation. The data sets were collected using the  $\omega$  scan mode over the 2 $\theta$  range up to 64°. The CrysAlisPro program package was employed for data collection, cell refinement, and data reduction.<sup>4</sup> The structures were solved by direct methods and refined using the SHELXS, SHELXT, and SHELXL programs, respectively.<sup>5,6</sup> The structural refinement was performed on  $F^2$



using all data. Hydrogen atoms were placed in calculated positions and treated as riding on their parent atoms. All calculations were performed using the WINGX<sup>7</sup> or Olex2<sup>8</sup> crystallographic suite of programs. The molecular structures of compounds and their molecular packing projections were prepared by Mercury.<sup>9</sup>

## References

1. STARe Evaluation Software Version 17.00. Mettler–Toledo GmbH, 2022.
2. Data Viewer Version 1.9a, PANalytical B.V. Almelo, The Netherlands, 2018.
3. Omnic Spectra Software 9.9.549, Thermo Fisher Scientific, 2018.
4. Rigaku Oxford Diffraction, Gemini CCD system, CrysAlis Pro software, Version 171.41.93a, 2020.
5. (a) G. M. Sheldrick, *Acta Cryst. A*, 2008, **64**, 112–122; (b) G. M. Sheldrick, *Acta Cryst. C*, 2015, **71**, 3–8.
6. G. M. Sheldrick, *Acta Cryst. A*, 2015, **71**, 3–8.
7. L. J. Farrugia, *J. Appl. Cryst.*, 2012, **45**, 849–854.
8. O. V. Dolomanov, L. J. Bourhis, R. J. Gildea, J. A. K. Howard, H. Puschmann, *J. Appl. Cryst.*, 2009, **42**, 339–341.
9. C. F. Macrae, I. J. Bruno, J. A. Chisholm, P. R. Edgington, P. McCabe, E. Pidcock, L. Rodriguez-Monge, R. Taylor, J. v. d. Streek and P. A. Wood, *J. Appl. Crystallogr.* **2008**, 41, 466.

**Table S1.** Crystal data and refinement details for the prepared compounds.

|                                                                         | <b>(tfox)<sub>2</sub>(14tfib)</b>                                                                | <b>(tfox)(135tfib)</b>                                                             |
|-------------------------------------------------------------------------|--------------------------------------------------------------------------------------------------|------------------------------------------------------------------------------------|
| Molecular formula                                                       | (C <sub>7</sub> H <sub>5</sub> NOS) <sub>2</sub> (C <sub>6</sub> F <sub>4</sub> I <sub>2</sub> ) | (C <sub>7</sub> H <sub>5</sub> NOS)(C <sub>6</sub> F <sub>3</sub> I <sub>3</sub> ) |
| <i>M<sub>r</sub></i>                                                    | 704.22                                                                                           | 660.94                                                                             |
| Crystal system                                                          | triclinic                                                                                        | triclinic                                                                          |
| Space group                                                             | <i>P</i> –1                                                                                      | <i>P</i> –1                                                                        |
| Crystal data:                                                           |                                                                                                  |                                                                                    |
| <i>a</i> / Å                                                            | 5.8434(3)                                                                                        | 9.1407(2)                                                                          |
| <i>b</i> / Å                                                            | 9.8958(4)                                                                                        | 9.6712(3)                                                                          |
| <i>c</i> / Å                                                            | 10.8439(5)                                                                                       | 10.5728(2)                                                                         |
| <i>α</i> / °                                                            | 68.788(4)                                                                                        | 83.925(2)                                                                          |
| <i>β</i> / °                                                            | 84.873(4)                                                                                        | 86.217(2)                                                                          |
| <i>γ</i> / °                                                            | 75.319(4)                                                                                        | 65.675(3)                                                                          |
| <i>V</i> / Å <sup>3</sup>                                               | 565.48(5)                                                                                        | 846.64(4)                                                                          |
| <i>Z</i>                                                                | 1                                                                                                | 2                                                                                  |
| <i>D</i> <sub>calc</sub> / g cm <sup>-3</sup>                           | 2.068                                                                                            | 2.593                                                                              |
| <i>λ</i> (MoK <sub>α</sub> ) / Å                                        | 0.71073                                                                                          | 0.71073                                                                            |
| <i>T</i> / K                                                            | 294.98(10)                                                                                       | 295.00(10)                                                                         |
| Crystal size / mm <sup>3</sup>                                          | 0.44x0.20x0.13                                                                                   | 0.50x0.31x0.09                                                                     |
| <i>μ</i> / mm <sup>-1</sup>                                             | 3.019                                                                                            | 5.689                                                                              |
| <i>F</i> (000)                                                          | 334                                                                                              | 600                                                                                |
| Refl. collected/unique                                                  | 12008/3927                                                                                       | 20245/5899                                                                         |
| Parameters/restraints                                                   | 145/0                                                                                            | 237/28                                                                             |
| <i>Δρ</i> <sub>max</sub> , <i>Δρ</i> <sub>min</sub> / e Å <sup>-3</sup> | 0.841, -0.466                                                                                    | 0.777, -1.319                                                                      |
| <i>R</i> [ <i>F</i> <sup>2</sup> > 4σ( <i>F</i> <sup>2</sup> )]         | 0.0305                                                                                           | 0.0341                                                                             |
| w <i>R</i> ( <i>F</i> <sup>2</sup> )                                    | 0.0843                                                                                           | 0.0907                                                                             |
| Goodness-of-fit, <i>S</i>                                               | 1.044                                                                                            | 1.071                                                                              |

**Table S1.** Continued

|                                                                          | <b>(fox)(14tfib)</b>                                                                            | <b>(fox)(135tfib)</b>                                                                           |
|--------------------------------------------------------------------------|-------------------------------------------------------------------------------------------------|-------------------------------------------------------------------------------------------------|
| Molecular formula                                                        | (C <sub>7</sub> H <sub>5</sub> NO <sub>2</sub> )(C <sub>6</sub> F <sub>4</sub> I <sub>2</sub> ) | (C <sub>7</sub> H <sub>5</sub> NO <sub>2</sub> )(C <sub>6</sub> F <sub>3</sub> I <sub>3</sub> ) |
| <i>M</i> <sub>r</sub>                                                    | 536.98                                                                                          | 644.88                                                                                          |
| Crystal system                                                           | monoclinic                                                                                      | monoclinic                                                                                      |
| Space group                                                              | <i>P</i> 2 <sub>1</sub>                                                                         | <i>C</i> <i>c</i>                                                                               |
| Crystal data:                                                            |                                                                                                 |                                                                                                 |
| <i>a</i> / Å                                                             | 5.7685(5)                                                                                       | 4.9817(2)                                                                                       |
| <i>b</i> / Å                                                             | 16.8433(9)                                                                                      | 17.5239(4)                                                                                      |
| <i>c</i> / Å                                                             | 7.91999(5)                                                                                      | 19.04049(7)                                                                                     |
| <i>α</i> / °                                                             | 90                                                                                              | 90                                                                                              |
| <i>β</i> / °                                                             | 97.137(7)                                                                                       | 93.994(3)                                                                                       |
| <i>γ</i> / °                                                             | 90                                                                                              | 90                                                                                              |
| <i>V</i> / Å <sup>3</sup>                                                | 763.54(9)                                                                                       | 1658.21(10)                                                                                     |
| <i>Z</i>                                                                 | 2                                                                                               | 4                                                                                               |
| <i>D</i> <sub>calc</sub> / g cm <sup>-3</sup>                            | 2.336                                                                                           | 2.583                                                                                           |
| <i>λ</i> (MoK <sub>α</sub> ) / Å                                         | 0.71073                                                                                         | 0.71073                                                                                         |
| <i>T</i> / K                                                             | 295                                                                                             | 294.99(10)                                                                                      |
| Crystal size / mm <sup>3</sup>                                           | 0.54x0.28x0.07                                                                                  | 0.54x0.32x0.16                                                                                  |
| <i>μ</i> / mm <sup>-1</sup>                                              | 4.166                                                                                           | 5.688                                                                                           |
| <i>F</i> (000)                                                           | 496                                                                                             | 1168                                                                                            |
| Refl. Collected/unique                                                   | 3182/2022                                                                                       | 21219/5487                                                                                      |
| Parameters/restraints                                                    | 199/1                                                                                           | 200/2                                                                                           |
| $\Delta\rho_{\max}$ , $\Delta\rho_{\min}$ / e Å <sup>-3</sup>            | 0.481, -0.444                                                                                   | 1.108, -1.477                                                                                   |
| <i>R</i> [ <i>F</i> <sup>2</sup> > 4 $\sigma$ ( <i>F</i> <sup>2</sup> )] | 0.0428                                                                                          | 0.0333                                                                                          |
| w <i>R</i> ( <i>F</i> <sup>2</sup> )                                     | 0.0777                                                                                          | 0.0909                                                                                          |
| Goodness-of-fit, <i>S</i>                                                | 1.009                                                                                           | 1.084                                                                                           |

**Table S1.** Continued

|                                                                      | <b>(pox)(14tfib)</b>                                                                            | <b>(pox)(135tfib)</b>                                                                           | <b>(pox)(12tfib)<sub>2</sub></b>                                                                             | <b>(pox)(13tfib)</b>                                                                            |
|----------------------------------------------------------------------|-------------------------------------------------------------------------------------------------|-------------------------------------------------------------------------------------------------|--------------------------------------------------------------------------------------------------------------|-------------------------------------------------------------------------------------------------|
| Molecular formula                                                    | (C <sub>8</sub> H <sub>6</sub> N <sub>2</sub> O)(C <sub>6</sub> F <sub>4</sub> I <sub>2</sub> ) | (C <sub>8</sub> H <sub>6</sub> N <sub>2</sub> O)(C <sub>6</sub> F <sub>3</sub> I <sub>3</sub> ) | (C <sub>8</sub> H <sub>6</sub> N <sub>2</sub> O)(C <sub>6</sub> F <sub>4</sub> I <sub>2</sub> ) <sub>2</sub> | (C <sub>8</sub> H <sub>6</sub> N <sub>2</sub> O)(C <sub>6</sub> F <sub>4</sub> I <sub>2</sub> ) |
| $M_r$                                                                | 548.01                                                                                          | 655.91                                                                                          | 949.87                                                                                                       | 548.01                                                                                          |
| Crystal system                                                       | orthorhombic                                                                                    | monoclinic                                                                                      | monoclinic                                                                                                   | orthorhombic                                                                                    |
| Space group                                                          | <i>P bcn</i>                                                                                    | <i>P 2<sub>1</sub>/n</i>                                                                        | <i>P 2<sub>1</sub>/n</i>                                                                                     | <i>P 2<sub>1</sub>2<sub>1</sub>2<sub>1</sub></i>                                                |
| Crystal data:                                                        |                                                                                                 |                                                                                                 |                                                                                                              |                                                                                                 |
| $a / \text{Å}$                                                       | 17.9765(13)                                                                                     | 4.9988(3)                                                                                       | 7.3099(5)                                                                                                    | 5.99780(10)                                                                                     |
| $b / \text{Å}$                                                       | 12.8650(13)                                                                                     | 17.7100(8)                                                                                      | 12.9537(11)                                                                                                  | 7.7740(2)                                                                                       |
| $c / \text{Å}$                                                       | 13.6805(10)                                                                                     | 19.4968(10)                                                                                     | 26.1341(15)                                                                                                  | 32.9740(7)                                                                                      |
| $\alpha / ^\circ$                                                    | 90                                                                                              | 90                                                                                              | 90                                                                                                           | 90                                                                                              |
| $\beta / ^\circ$                                                     | 90                                                                                              | 95.150(5)                                                                                       | 90.842(6)                                                                                                    | 90                                                                                              |
| $\gamma / ^\circ$                                                    | 90                                                                                              | 90                                                                                              | 90                                                                                                           | 90                                                                                              |
| $V / \text{Å}^3$                                                     | 3163.9(5)                                                                                       | 1719.06(16)                                                                                     | 2474.4(3)                                                                                                    | 1537.48(6)                                                                                      |
| $Z$                                                                  | 8                                                                                               | 4                                                                                               | 4                                                                                                            | 4                                                                                               |
| $D_{\text{calc}} / \text{g cm}^{-3}$                                 | 2.301                                                                                           | 2.534                                                                                           | 2.550                                                                                                        | 2.367                                                                                           |
| $\lambda(\text{MoK}\alpha) / \text{Å}$                               | 0.71073                                                                                         | 0.71073                                                                                         | 0.71073                                                                                                      | 0.71073                                                                                         |
| $T / \text{K}$                                                       | 295                                                                                             | 295                                                                                             | 295                                                                                                          | 169.99(10)                                                                                      |
| Crystal size / mm <sup>3</sup>                                       | 0.83x0.31x0.18                                                                                  | 0.98x0.53x0.23                                                                                  | 0.81x0.47x0.18                                                                                               | 0.333x0.138x0.046                                                                               |
| $\mu / \text{mm}^{-1}$                                               | 4.021                                                                                           | 5.487                                                                                           | 5.114                                                                                                        | 4.137                                                                                           |
| $F(000)$                                                             | 2032                                                                                            | 1192                                                                                            | 1728                                                                                                         | 1016                                                                                            |
| Refl. Collected/unique                                               | 26107/2773                                                                                      | 16079/3748                                                                                      | 18802/4346                                                                                                   | 28925/4483                                                                                      |
| Parameters/restraints                                                | 208/0                                                                                           | 208/0                                                                                           | 316/0                                                                                                        | 209/0                                                                                           |
| $\Delta\rho_{\text{max}}, \Delta\rho_{\text{min}} / \text{e Å}^{-3}$ | 1.692, -1.232                                                                                   | 1.354, -1.798                                                                                   | 2.421, -0.796                                                                                                | 0.316, -0.365                                                                                   |
| $R[F^2 > 4\sigma(F^2)]$                                              | 0.0657                                                                                          | 0.0556                                                                                          | 0.0748                                                                                                       | 0.0187                                                                                          |
| $wR(F^2)$                                                            | 0.2040                                                                                          | 0.1214                                                                                          | 0.1927                                                                                                       | 0.0364                                                                                          |
| Goodness-of-fit, $S$                                                 | 1.074                                                                                           | 1.181                                                                                           | 1.065                                                                                                        | 1.030                                                                                           |

**Table S1.** Continued

|                                                                        | <b>(tolox)(14tfib)</b>                                                             | <b>(tolox)(135tfib)</b>                                                            |
|------------------------------------------------------------------------|------------------------------------------------------------------------------------|------------------------------------------------------------------------------------|
| Molecular formula                                                      | (C <sub>10</sub> H <sub>9</sub> NO)(C <sub>6</sub> F <sub>4</sub> I <sub>2</sub> ) | (C <sub>10</sub> H <sub>9</sub> NO)(C <sub>6</sub> F <sub>3</sub> I <sub>3</sub> ) |
| $M_r$                                                                  | 561.04                                                                             | 668.94                                                                             |
| Crystal system                                                         | monoclinic                                                                         | monoclinic                                                                         |
| Space group                                                            | $P 2_1$                                                                            | $C c$                                                                              |
| Crystal data:                                                          |                                                                                    |                                                                                    |
| $a / \text{\AA}$                                                       | 9.0215(11)                                                                         | 17.6258(2)                                                                         |
| $b / \text{\AA}$                                                       | 5.9752(6)                                                                          | 4.72480(10)                                                                        |
| $c / \text{\AA}$                                                       | 16.633(2)                                                                          | 22.8559(3)                                                                         |
| $\alpha / ^\circ$                                                      | 90                                                                                 | 90                                                                                 |
| $\beta / ^\circ$                                                       | 102.764(12)                                                                        | 97.2400(10)                                                                        |
| $\gamma / ^\circ$                                                      | 90                                                                                 | 90                                                                                 |
| $V / \text{\AA}^3$                                                     | 874.46(18)                                                                         | 1888.23(5)                                                                         |
| $Z$                                                                    | 2                                                                                  | 4                                                                                  |
| $D_{\text{calc}} / \text{g cm}^{-3}$                                   | 2.131                                                                              | 2.353                                                                              |
| $\lambda(\text{MoK}\alpha) / \text{\AA}$                               | 0.71073                                                                            | 0.71073                                                                            |
| $T / \text{K}$                                                         | 295                                                                                | 295                                                                                |
| Crystal size / mm <sup>3</sup>                                         | 0.89x0.48x0.36                                                                     | 0.84x0.19x0.12                                                                     |
| $\mu / \text{mm}^{-1}$                                                 | 3.638                                                                              | 4.996                                                                              |
| $F(000)$                                                               | 524                                                                                | 1224                                                                               |
| Refl. collected/unique                                                 | 9976/5634                                                                          | 137954/6510                                                                        |
| Parameters/restraints                                                  | 218/1                                                                              | 218/2                                                                              |
| $\Delta\rho_{\text{max}}, \Delta\rho_{\text{min}} / \text{e \AA}^{-3}$ | 0.589, -0.417                                                                      | 1.067, -1.012                                                                      |
| $R[F^2 > 4\sigma(F^2)]$                                                | 0.0368                                                                             | 0.0417                                                                             |
| $wR(F^2)$                                                              | 0.0815                                                                             | 0.1233                                                                             |
| Goodness-of-fit, $S$                                                   | 1.024                                                                              | 1.032                                                                              |

**Table S1.** continued

| <b>nox</b>                                                             |                                                             |
|------------------------------------------------------------------------|-------------------------------------------------------------|
| Molecular formula                                                      | C <sub>9</sub> H <sub>6</sub> N <sub>2</sub> O <sub>3</sub> |
| $M_r$                                                                  | 190.16                                                      |
| Crystal system                                                         | monoclinic                                                  |
| Space group                                                            | <i>C</i> 2/ <i>c</i>                                        |
| Crystal data:                                                          |                                                             |
| $a / \text{\AA}$                                                       | 19.0306(7)                                                  |
| $b / \text{\AA}$                                                       | 6.4052(2)                                                   |
| $c / \text{\AA}$                                                       | 14.0416(5)                                                  |
| $\alpha / ^\circ$                                                      | 90                                                          |
| $\beta / ^\circ$                                                       | 102.248(4)                                                  |
| $\gamma / ^\circ$                                                      | 90                                                          |
| $V / \text{\AA}^3$                                                     | 1672.64(10)                                                 |
| $Z$                                                                    | 8                                                           |
| $D_{\text{calc}} / \text{g cm}^{-3}$                                   | 1.510                                                       |
| $\lambda(\text{MoK}\alpha) / \text{\AA}$                               | 0.71073                                                     |
| $T / \text{K}$                                                         | 295                                                         |
| Crystal size / mm <sup>3</sup>                                         | 0.92x0.70x0.50                                              |
| $\mu / \text{mm}^{-1}$                                                 | 0.117                                                       |
| $F(000)$                                                               | 784                                                         |
| Refl. collected/unique                                                 | 17343/2860                                                  |
| Parameters/restraints                                                  | 127/0                                                       |
| $\Delta\rho_{\text{max}}, \Delta\rho_{\text{min}} / \text{e \AA}^{-3}$ | 0.218, -0.200                                               |
| $R[F^2 > 4\sigma(F^2)]$                                                | 0.0504                                                      |
| $wR(F^2)$                                                              | 0.1500                                                      |
| Goodness-of-fit, $S$                                                   | 1.019                                                       |

**Table S1.** continued

|                                                                        | <b>(nox)(14tfib)</b>                                                                                          | <b>(nox)(135tfib)</b>                                                                                         |
|------------------------------------------------------------------------|---------------------------------------------------------------------------------------------------------------|---------------------------------------------------------------------------------------------------------------|
| Molecular formula                                                      | (C <sub>9</sub> H <sub>6</sub> N <sub>2</sub> O <sub>3</sub> )(C <sub>6</sub> F <sub>4</sub> I <sub>2</sub> ) | (C <sub>9</sub> H <sub>6</sub> N <sub>2</sub> O <sub>3</sub> )(C <sub>6</sub> F <sub>3</sub> I <sub>3</sub> ) |
| $M_r$                                                                  | 592.02                                                                                                        | 699.92                                                                                                        |
| Crystal system                                                         | monoclinic                                                                                                    | monoclinic                                                                                                    |
| Space group                                                            | $P 2_1/n$                                                                                                     | $C c$                                                                                                         |
| Crystal data:                                                          |                                                                                                               |                                                                                                               |
| $a / \text{\AA}$                                                       | 8.7028(3)                                                                                                     | 4.9443(2)                                                                                                     |
| $b / \text{\AA}$                                                       | 21.0309(10)                                                                                                   | 17.6264(6)                                                                                                    |
| $c / \text{\AA}$                                                       | 9.4060(3)                                                                                                     | 21.8090(9)                                                                                                    |
| $\alpha / ^\circ$                                                      | 90                                                                                                            | 90                                                                                                            |
| $\beta / ^\circ$                                                       | 95.139(4)                                                                                                     | 96.092(4)                                                                                                     |
| $\gamma / ^\circ$                                                      | 90                                                                                                            | 90                                                                                                            |
| $V / \text{\AA}^3$                                                     | 1714.64(12)                                                                                                   | 1889.93(13)                                                                                                   |
| $Z$                                                                    | 4                                                                                                             | 4                                                                                                             |
| $D_{\text{calc}} / \text{g cm}^{-3}$                                   | 2.293                                                                                                         | 2.460                                                                                                         |
| $\lambda(\text{MoK}\alpha) / \text{\AA}$                               | 0.71073                                                                                                       | 0.71073                                                                                                       |
| $T / \text{K}$                                                         | 295                                                                                                           | 298.14(10)                                                                                                    |
| Crystal size / mm <sup>3</sup>                                         | 0.66x0.23x0.08                                                                                                | 0.59x0.19x0.10                                                                                                |
| $\mu / \text{mm}^{-1}$                                                 | 3.728                                                                                                         | 5.007                                                                                                         |
| $F(000)$                                                               | 1104                                                                                                          | 1280                                                                                                          |
| Refl. collected/unique                                                 | 14295/3717                                                                                                    | 8160/3592                                                                                                     |
| Parameters/restraints                                                  | 235/0                                                                                                         | 235/2                                                                                                         |
| $\Delta\rho_{\text{max}}, \Delta\rho_{\text{min}} / \text{e \AA}^{-3}$ | 0.548, -0.760                                                                                                 | 0.900, -0.869                                                                                                 |
| $R[F^2 > 4\sigma(F^2)]$                                                | 0.0357                                                                                                        | 0.0302                                                                                                        |
| $wR(F^2)$                                                              | 0.0599                                                                                                        | 0.0748                                                                                                        |
| Goodness-of-fit, $S$                                                   | 1.017                                                                                                         | 1.073                                                                                                         |

**Table S1.** continued

|                                                                        | <b>box</b>                       |
|------------------------------------------------------------------------|----------------------------------|
| Molecular formula                                                      | C <sub>7</sub> H <sub>5</sub> NO |
| $M_r$                                                                  | 119.12                           |
| Crystal system                                                         | monoclinic                       |
| Space group                                                            | <i>C</i> 2/ <i>c</i>             |
| Crystal data:                                                          |                                  |
| $a / \text{\AA}$                                                       | 11.7125(4)                       |
| $b / \text{\AA}$                                                       | 8.7742(3)                        |
| $c / \text{\AA}$                                                       | 22.0600(8)                       |
| $\alpha / ^\circ$                                                      | 90                               |
| $\beta / ^\circ$                                                       | 98.273(3)                        |
| $\gamma / ^\circ$                                                      | 90                               |
| $V / \text{\AA}^3$                                                     | 2243.47(14)                      |
| $Z$                                                                    | 16                               |
| $D_{\text{calc}} / \text{g cm}^{-3}$                                   | 1.411                            |
| $\lambda(\text{MoK}\alpha) / \text{\AA}$                               | 0.71073                          |
| $T / \text{K}$                                                         | 169.99(0)                        |
| Crystal size / mm <sup>3</sup>                                         | 0.636x0.564x0.123                |
| $\mu / \text{mm}^{-1}$                                                 | 0.097                            |
| $F(000)$                                                               | 992                              |
| Refl. collected/unique                                                 | 12585/3284                       |
| Parameters/restraints                                                  | 163/0                            |
| $\Delta\rho_{\text{max}}, \Delta\rho_{\text{min}} / \text{e \AA}^{-3}$ | 0.253, -0.316                    |
| $R[F^2 > 4\sigma(F^2)]$                                                | 0.0426                           |
| $wR(F^2)$                                                              | 0.1231                           |
| Goodness-of-fit, $S$                                                   | 1.082                            |



**Table S1.** continued

|                                                                        | <b>(box)(14tfib)</b>                                                              | <b>(box)<sub>3</sub>(135tfib)</b>                                                               | <b>(box)(12tfib)</b>                                                              |
|------------------------------------------------------------------------|-----------------------------------------------------------------------------------|-------------------------------------------------------------------------------------------------|-----------------------------------------------------------------------------------|
| Molecular formula                                                      | (C <sub>7</sub> H <sub>5</sub> NO)(C <sub>6</sub> F <sub>4</sub> I <sub>2</sub> ) | (C <sub>7</sub> H <sub>5</sub> NO) <sub>3</sub> (C <sub>6</sub> F <sub>3</sub> I <sub>3</sub> ) | (C <sub>7</sub> H <sub>5</sub> NO)(C <sub>6</sub> F <sub>4</sub> I <sub>2</sub> ) |
| $M_r$                                                                  | 520.98                                                                            | 867.12                                                                                          | 520.98                                                                            |
| Crystal system                                                         | monoclinic                                                                        | triclinic                                                                                       | monoclinic                                                                        |
| Space group                                                            | $P 2_1/n$                                                                         | $P -1$                                                                                          | $P 2_1/n$                                                                         |
| Crystal data:                                                          |                                                                                   |                                                                                                 |                                                                                   |
| $a / \text{\AA}$                                                       | 14.1322(4)                                                                        | 10.0238(5)                                                                                      | 14.4917(3)                                                                        |
| $b / \text{\AA}$                                                       | 5.5319(2)                                                                         | 11.0764(5)                                                                                      | 7.3816(2)                                                                         |
| $c / \text{\AA}$                                                       | 18.6410(5)                                                                        | 12.9002(4)                                                                                      | 26.3414(5)                                                                        |
| $\alpha / ^\circ$                                                      | 90                                                                                | 99.313(3)                                                                                       | 90                                                                                |
| $\beta / ^\circ$                                                       | 95.506(3)                                                                         | 95.503(3)                                                                                       | 90.223(2)                                                                         |
| $\gamma / ^\circ$                                                      | 90                                                                                | 94.395(4)                                                                                       | 90                                                                                |
| $V / \text{\AA}^3$                                                     | 1450.59(8)                                                                        | 1400.68(10)                                                                                     | 2817.77(11)                                                                       |
| $Z$                                                                    | 4                                                                                 | 2                                                                                               | 8                                                                                 |
| $D_{\text{calc}} / \text{g cm}^{-3}$                                   | 2.376                                                                             | 2.056                                                                                           | 2.456                                                                             |
| $\lambda(\text{MoK}\alpha) / \text{\AA}$                               | 0.71073                                                                           | 0.71073                                                                                         | 0.71073                                                                           |
| $T / \text{K}$                                                         | 150(2)                                                                            | 169.99(10)                                                                                      | 169.99(10)                                                                        |
| Crystal size / mm <sup>3</sup>                                         | 0.35x0.30x0.22                                                                    | 0.77x0.54x0.20                                                                                  | 0.58x0.08x0.07                                                                    |
| $\mu / \text{mm}^{-1}$                                                 | 4.373                                                                             | 3.401                                                                                           | 4.506                                                                             |
| $F(000)$                                                               | 956                                                                               | 816                                                                                             | 1920                                                                              |
| Refl. collected/unique                                                 | 15556/3155                                                                        | 31744/9710                                                                                      | 46796/9684                                                                        |
| Parameters/restraints                                                  | 190/0                                                                             | 352/0                                                                                           | 379/0                                                                             |
| $\Delta\rho_{\text{max}}, \Delta\rho_{\text{min}} / \text{e \AA}^{-3}$ | 0.533, -0.764                                                                     | 3.007, -2.140                                                                                   | 0.952, -0.865                                                                     |
| $R[F^2 > 4\sigma(F^2)]$                                                | 0.0269                                                                            | 0.0607                                                                                          | 0.0287                                                                            |
| w $R(F^2)$                                                             | 0.0698                                                                            | 0.1870                                                                                          | 0.0635                                                                            |
| Goodness-of-fit, $S$                                                   | 0.932                                                                             | 1.033                                                                                           | 1.027                                                                             |

|                                                                          | <b>(phox)(14tfib)</b>                                                             | <b>(phox)(135tfib)</b>                                                            | <b>(phox)(12tfib)<sub>2</sub></b>                                                              | <b>(phox)(13tfib)</b>                                                             |
|--------------------------------------------------------------------------|-----------------------------------------------------------------------------------|-----------------------------------------------------------------------------------|------------------------------------------------------------------------------------------------|-----------------------------------------------------------------------------------|
| Molecular formula                                                        | (C <sub>9</sub> H <sub>7</sub> NO)(C <sub>6</sub> F <sub>4</sub> I <sub>2</sub> ) | (C <sub>9</sub> H <sub>7</sub> NO)(C <sub>6</sub> F <sub>3</sub> I <sub>3</sub> ) | (C <sub>9</sub> H <sub>7</sub> NO)(C <sub>6</sub> F <sub>4</sub> I <sub>2</sub> ) <sub>2</sub> | (C <sub>9</sub> H <sub>7</sub> NO)(C <sub>6</sub> F <sub>4</sub> I <sub>2</sub> ) |
| <i>M<sub>r</sub></i>                                                     | 547.02                                                                            | 654.92                                                                            | 948.88                                                                                         | 547.02                                                                            |
| Crystal system                                                           | monoclinic                                                                        | triclinic                                                                         | monoclinic                                                                                     | triclinic                                                                         |
| Space group                                                              | <i>P</i> 2 <sub>1</sub>                                                           | <i>P</i> -1                                                                       | <i>C</i> 2/ <i>c</i>                                                                           | <i>P</i> -1                                                                       |
| Crystal data:                                                            |                                                                                   |                                                                                   |                                                                                                |                                                                                   |
| <i>a</i> / Å                                                             | 8.1546(5)                                                                         | 9.1993(4)                                                                         | 29.7446(14)                                                                                    | 8.1512(3)                                                                         |
| <i>b</i> / Å                                                             | 5.9866(3)                                                                         | 9.7631(4)                                                                         | 8.7558(2)                                                                                      | 9.2659(4)                                                                         |
| <i>c</i> / Å                                                             | 16.6160(7)                                                                        | 10.5954(3)                                                                        | 24.0108(11)                                                                                    | 11.0875(4)                                                                        |
| $\alpha$ / °                                                             | 90                                                                                | 84.563(3)                                                                         | 90                                                                                             | 103.811(3)                                                                        |
| $\beta$ / °                                                              | 97.011(5)                                                                         | 85.979(3)                                                                         | 127.927(7)                                                                                     | 95.582(3)                                                                         |
| $\gamma$ / °                                                             | 90                                                                                | 65.091(4)                                                                         | 90                                                                                             | 101.302(3)                                                                        |
| <i>V</i> / Å <sup>3</sup>                                                | 805.10(7)                                                                         | 858.73(6)                                                                         | 4932.6(5)                                                                                      | 788.26(5)                                                                         |
| <i>Z</i>                                                                 | 2                                                                                 | 2                                                                                 | 8                                                                                              | 2                                                                                 |
| <i>D</i> <sub>calc</sub> / g cm <sup>-3</sup>                            | 2.256                                                                             | 2.533                                                                             | 2.555                                                                                          | 2.305                                                                             |
| $\lambda(\text{MoK}\alpha)$ / Å                                          | 0.71073                                                                           | 0.71073                                                                           | 0.71073                                                                                        | 0.71073                                                                           |
| <i>T</i> / K                                                             | 295                                                                               | 298.09(10)                                                                        | 170.00(10)                                                                                     | 169.99(10)                                                                        |
| Crystal size / mm <sup>3</sup>                                           | 0.58x0.33x0.06                                                                    | 0.73x0.52x0.31                                                                    | 0.39x0.327x0.074                                                                               | 0.412x0.232x0.139                                                                 |
| $\mu$ / mm <sup>-1</sup>                                                 | 3.949                                                                             | 5.490                                                                             | 5.130                                                                                          | 4.033                                                                             |
| <i>F</i> (000)                                                           | 508                                                                               | 596                                                                               | 3456                                                                                           | 508                                                                               |
| Refl. collected/unique                                                   | 17587/5574                                                                        | 19979/5968                                                                        | 48908/7186                                                                                     | 14109/4595                                                                        |
| Parameters/restraints                                                    | 208/1                                                                             | 208/0                                                                             | 316/0                                                                                          | 208/0                                                                             |
| $\Delta\rho_{\text{max}}, \Delta\rho_{\text{min}}$ / e Å <sup>-3</sup>   | 0.708, -0.365                                                                     | 1.248, -1.416                                                                     | 1.720, -1.612                                                                                  | 0.762, -0.609                                                                     |
| <i>R</i> [ <i>F</i> <sup>2</sup> > 4 $\sigma$ ( <i>F</i> <sup>2</sup> )] | 0.0356                                                                            | 0.0405                                                                            | 0.0249                                                                                         | 0.0276                                                                            |
| w <i>R</i> ( <i>F</i> <sup>2</sup> )                                     | 0.1009                                                                            | 0.1126                                                                            | 0.0519                                                                                         | 0.0565                                                                            |
| Goodness-of-fit, <i>S</i>                                                | 0.990                                                                             | 1.040                                                                             | 1.010                                                                                          | 1.043                                                                             |



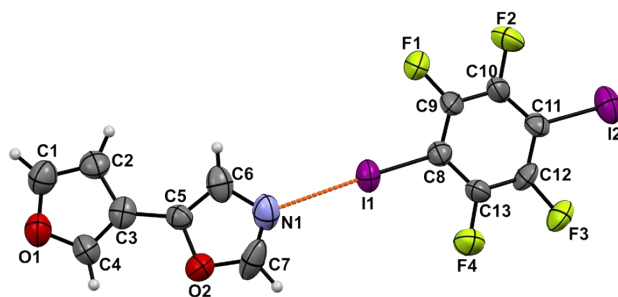

**Figure S3.** Partial molecular structure of **(fox)(14tfib)** showing the atom-labelling scheme. Displacement ellipsoids are drawn at the 50 % probability level, and H atoms are shown as small spheres of arbitrary radius.

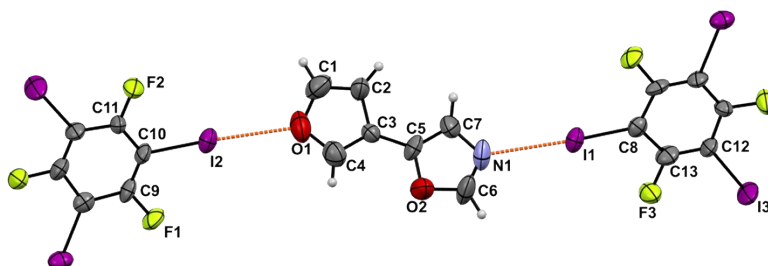

**Figure S4.** Partial molecular structure of **(fox)(135tfib)** showing the atom-labelling scheme. Displacement ellipsoids are drawn at the 50 % probability level, and H atoms are shown as small spheres of arbitrary radius.

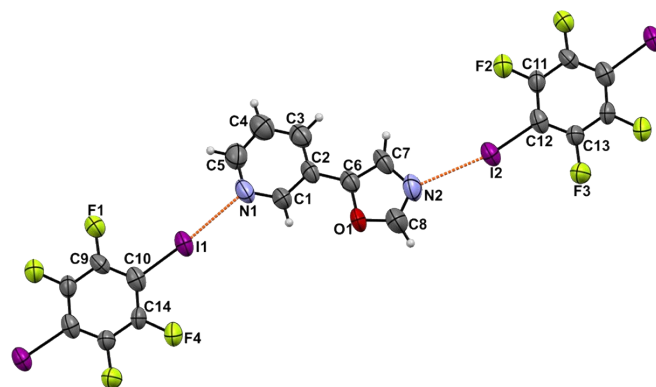

**Figure S5.** Partial molecular structure of **(pox)(14tfib)** showing the atom-labelling scheme. Displacement ellipsoids are drawn at the 50 % probability level, and H atoms are shown as small spheres of arbitrary radius.

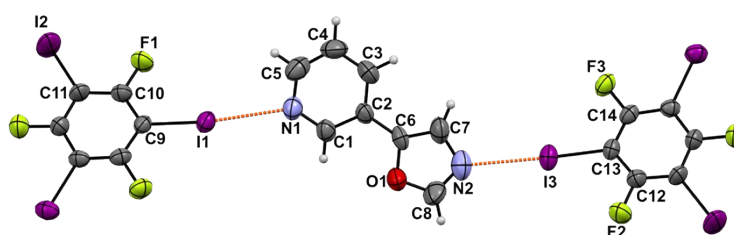

**Figure S6.** Partial molecular structure of **(pox)(135tfib)** showing the atom-labelling scheme. Displacement ellipsoids are drawn at the 50 % probability level, and H atoms are shown as small spheres of arbitrary radius.

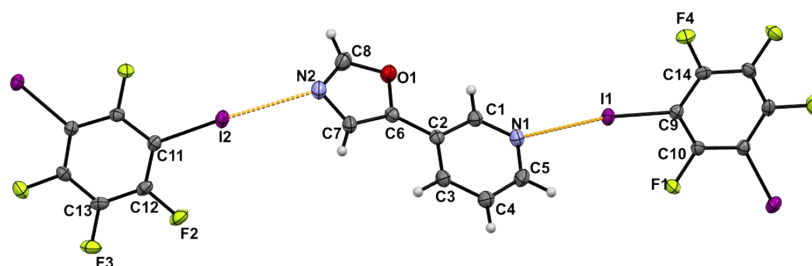

**Figure S7.** Partial molecular structure of **(pox)(13tfib)** showing the atom-labelling scheme. Displacement ellipsoids are drawn at the 50 % probability level, and H atoms are shown as small spheres of arbitrary radius.

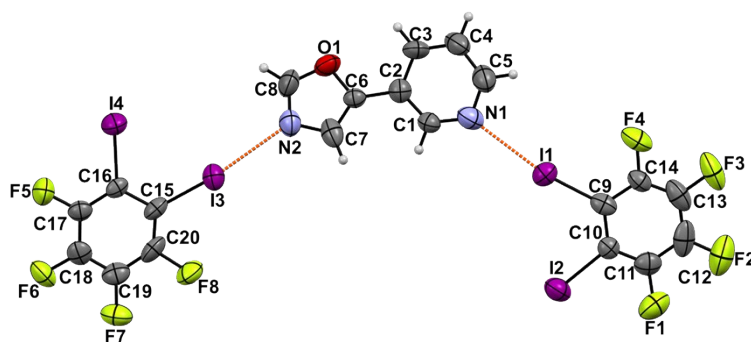

**Figure S8.** Partial molecular structure of **(pox)(12tfib)<sub>2</sub>** showing the atom-labelling scheme. Displacement ellipsoids are drawn at the 50 % probability level, and H atoms are shown as small spheres of arbitrary radius.

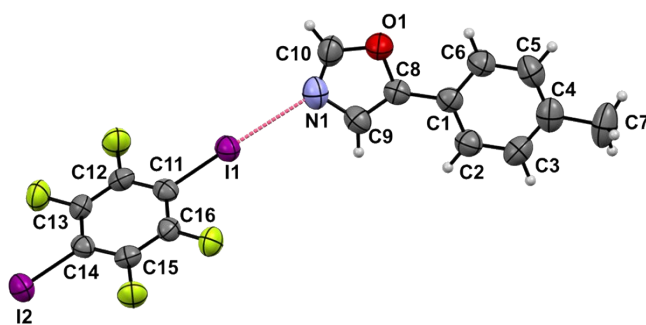

**Figure S9.** Partial molecular structure of (tolox)(14tfib) showing the atom-labelling scheme. Displacement ellipsoids are drawn at the 50 % probability level, and H atoms are shown as small spheres of arbitrary radius.

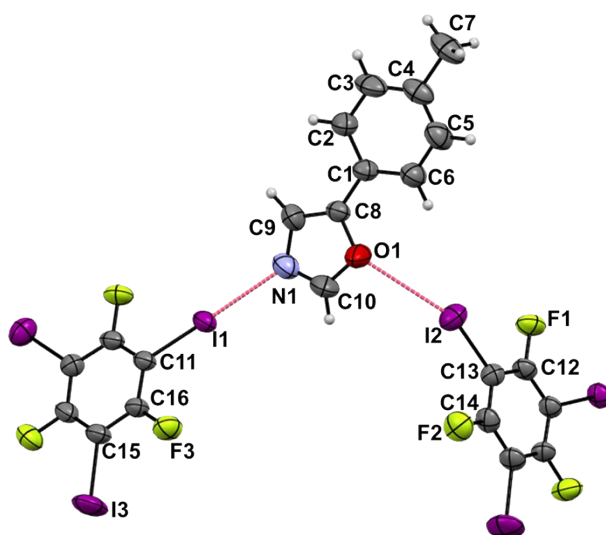

**Figure S10.** Partial molecular structure of (tolox)(135tfib) showing the atom-labelling scheme. Displacement ellipsoids are drawn at the 50 % probability level, and H atoms are shown as small spheres of arbitrary radius.

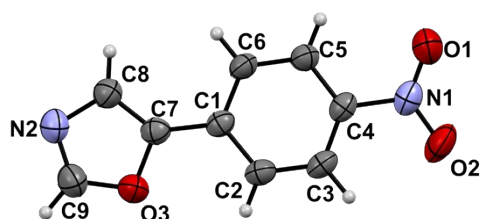

**Figure S11.** Molecular structure of **nox** showing the atom-labelling scheme. Displacement ellipsoids are drawn at the 50 % probability level, and H atoms are shown as small spheres of arbitrary radius.

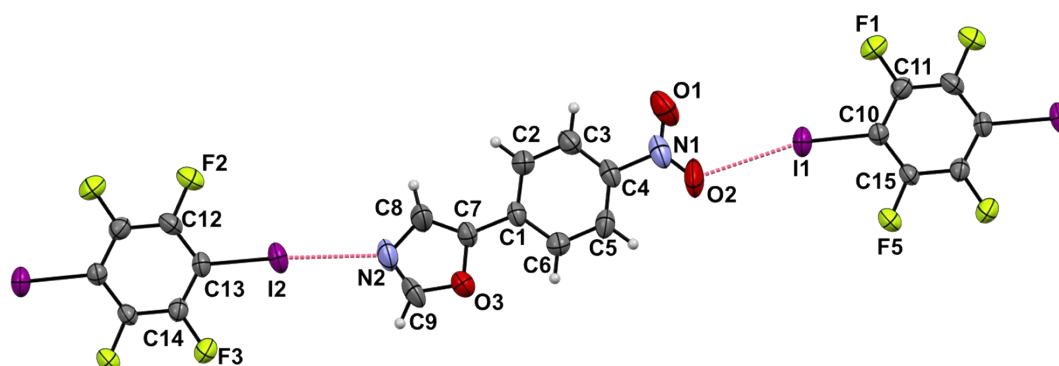

**Figure S12.** Molecular structure of **(nox)(14tfib)** showing the atom-labelling scheme. Displacement ellipsoids are drawn at the 50 % probability level, and H atoms are shown as small spheres of arbitrary radius.

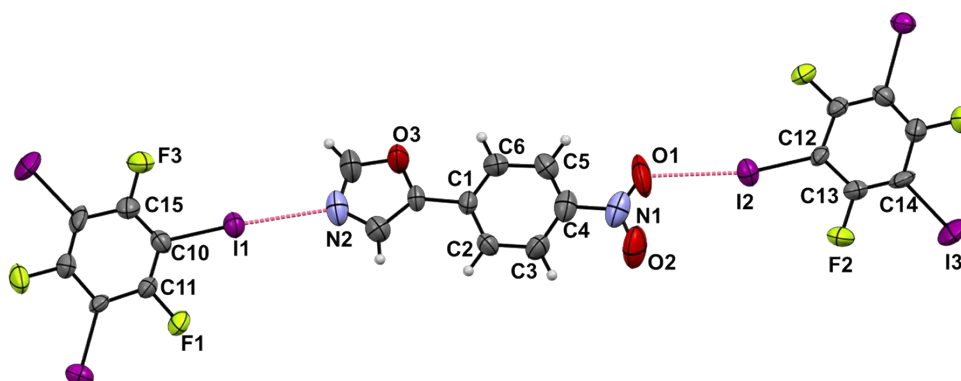

**Figure S13.** Molecular structure of **(nox)(135tfib)** showing the atom-labelling scheme. Displacement ellipsoids are drawn at the 50 % probability level, and H atoms are shown as small spheres of arbitrary radius.



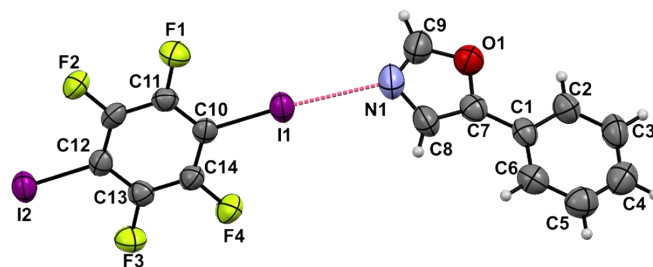

**Figure S14.** Molecular structure of **(phox)(14tfib)** showing the atom-labelling scheme. Displacement ellipsoids are drawn at the 50 % probability level, and H atoms are shown as small spheres of arbitrary radius.

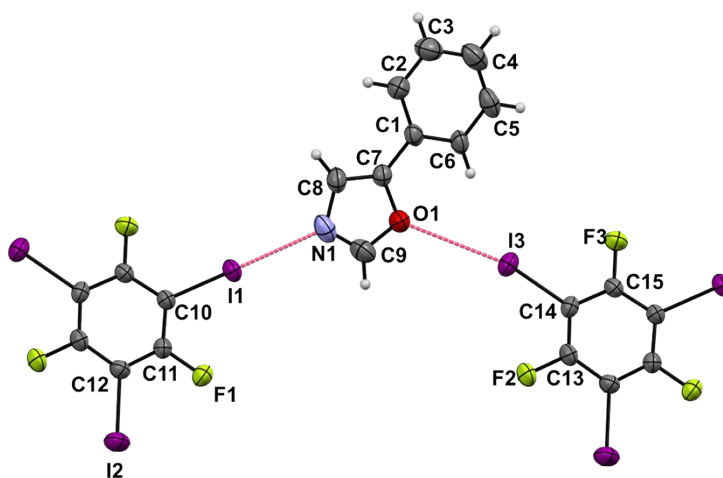

**Figure S15.** Molecular structure of **(phox)(135tfib)** showing the atom-labelling scheme. Displacement ellipsoids are drawn at the 50 % probability level, and H atoms are shown as small spheres of arbitrary radius.

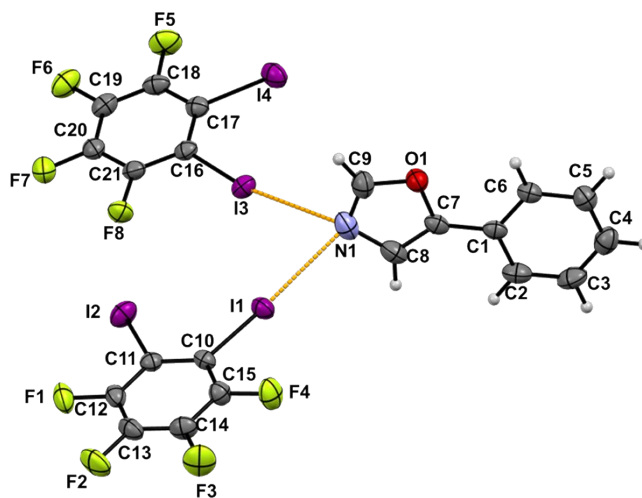

**Figure S16.** Molecular structure of **(phox)(12tfib)<sub>2</sub>** showing the atom-labelling scheme. Displacement ellipsoids are drawn at the 50 % probability level, and H atoms are shown as small spheres of arbitrary radius.

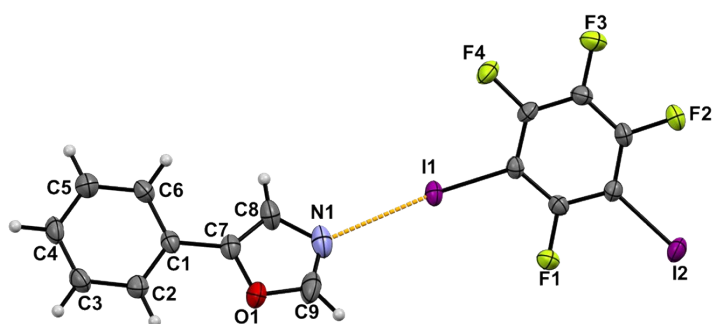

**Figure S17.** Molecular structure of **(phox)(13tfib)** showing the atom-labelling scheme. Displacement ellipsoids are drawn at the 50 % probability level, and H atoms are shown as small spheres of arbitrary radius.

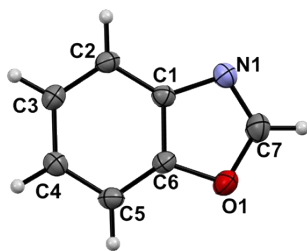

**Figure S18.** Molecular structure of **box** showing the atom-labelling scheme. Displacement ellipsoids are drawn at the 50 % probability level, and H atoms are shown as small spheres of arbitrary radius.

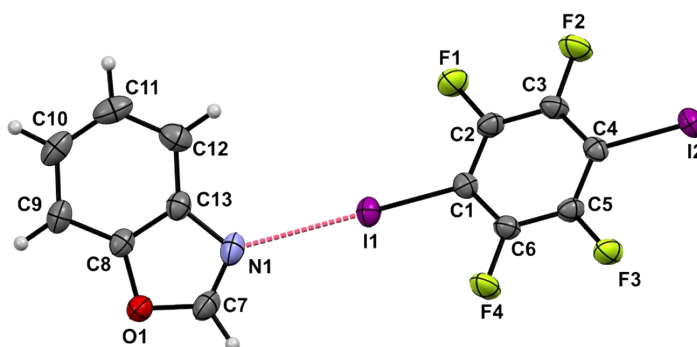

**Figure S19.** Molecular structure of **(box)(14tfib)** showing the atom-labelling scheme. Displacement ellipsoids are drawn at the 50 % probability level, and H atoms are shown as small spheres of arbitrary radius.

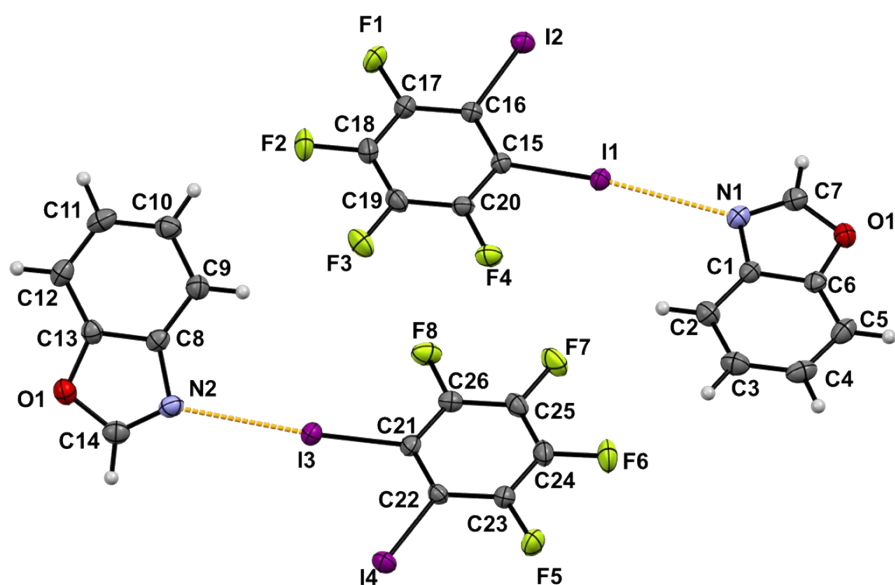

**Figure S20.** Molecular structure of **(box)(12tfib)** showing the atom-labelling scheme. Displacement ellipsoids are drawn at the 50 % probability level, and H atoms are shown as small spheres of arbitrary radius.

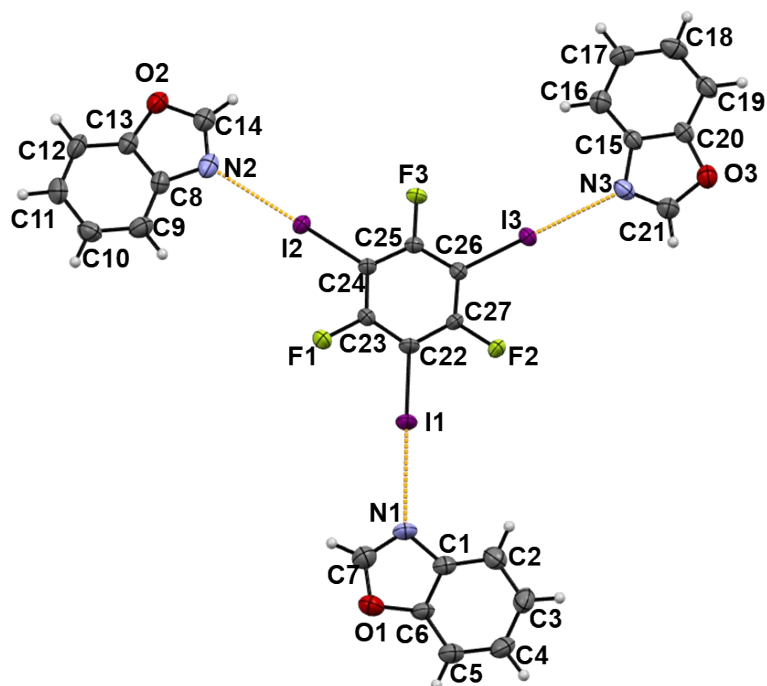

**Figure S21.** Molecular structure of (box)<sub>3</sub>(135tfib) showing the atom-labelling scheme. Displacement ellipsoids are drawn at the 50 % probability level, and H atoms are shown as small spheres of arbitrary radius.

**Table S2.** Melting / decomposition temperatures of prepared cocrystals or crystal phases obtained by cocrystallized reactants in determined stoichiometry.

| Compound                          | Onset melting / decomposition temperature |
|-----------------------------------|-------------------------------------------|
| <b>(tfox)<sub>2</sub>(14tfib)</b> | 54.7 °C                                   |
| <b>(tfox)(135tfib)</b>            | 81.2 °C                                   |
| <b>fox + 14tfib</b>               | 98.9 °C                                   |
| <b>fox + 135tfib</b>              | 145.9 °C                                  |
| <b>pox + 14tfib</b>               | 93.8 °C                                   |
| <b>pox + 135tfib</b>              | 122.6 °C                                  |
| <b>pox + 12tfib</b> (2 eq)        | 36.5 °C and 51.3 °C                       |
| <b>pox+13tfib</b>                 | 94.3 °C                                   |
| <b>tolox + 14tfib</b>             | 73.8 °C                                   |
| <b>(phox)(14tfib)</b>             | 81.6 °C                                   |
| <b>phox + 12tfib</b> (2 eq)       | 28.9 °C                                   |
| <b>phox+ 13tfib</b>               | 45.3 °C                                   |
| <b>(phox)(135tfib)</b>            | 107.5 °C                                  |
| <b>nox + 14tfib</b>               | 105.4 °C                                  |
| <b>nox +135tfib</b>               | 162.3 °C                                  |
| <b>box + 14tfib</b>               | 24.3 °C                                   |
| <b>box + 12tfib</b>               | 57.6 °C                                   |
| <b>box</b> (3eq.) + 135tfib       | 44.9 °C                                   |

### DSC Curves with Indicated Onset Temperatures

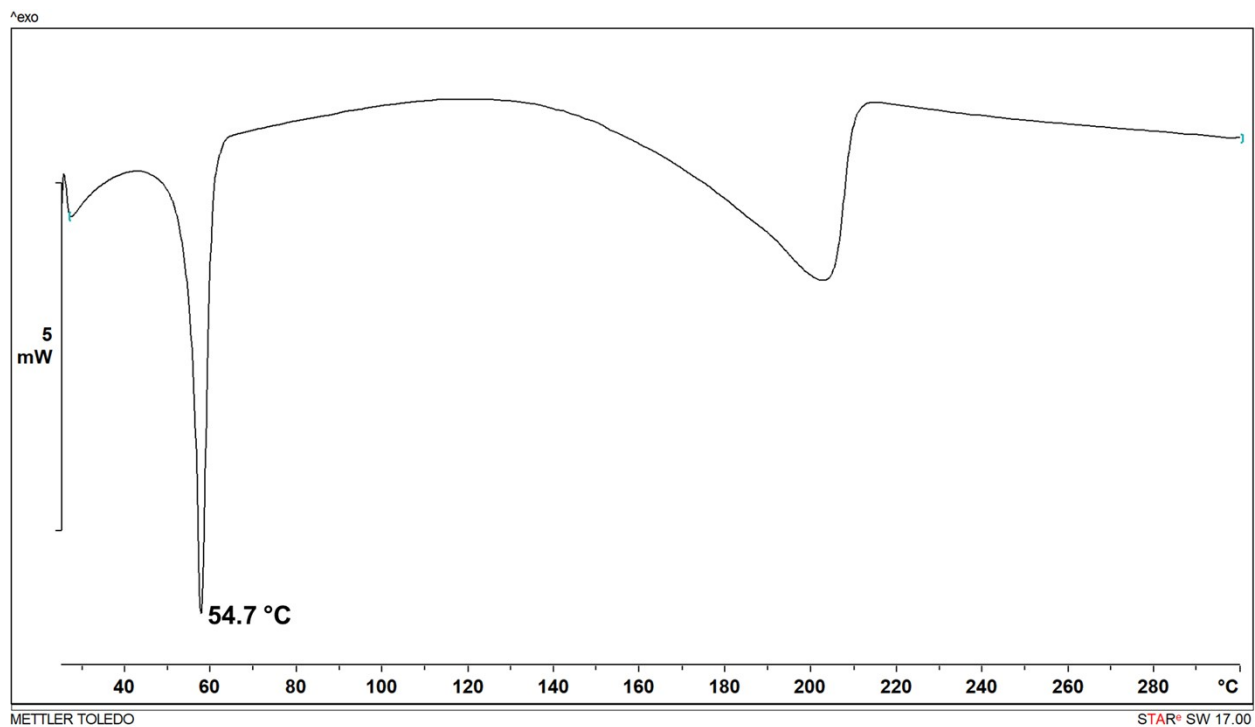

**Figure S22.** DSC curve of (tfox)<sub>2</sub>(14tfib)

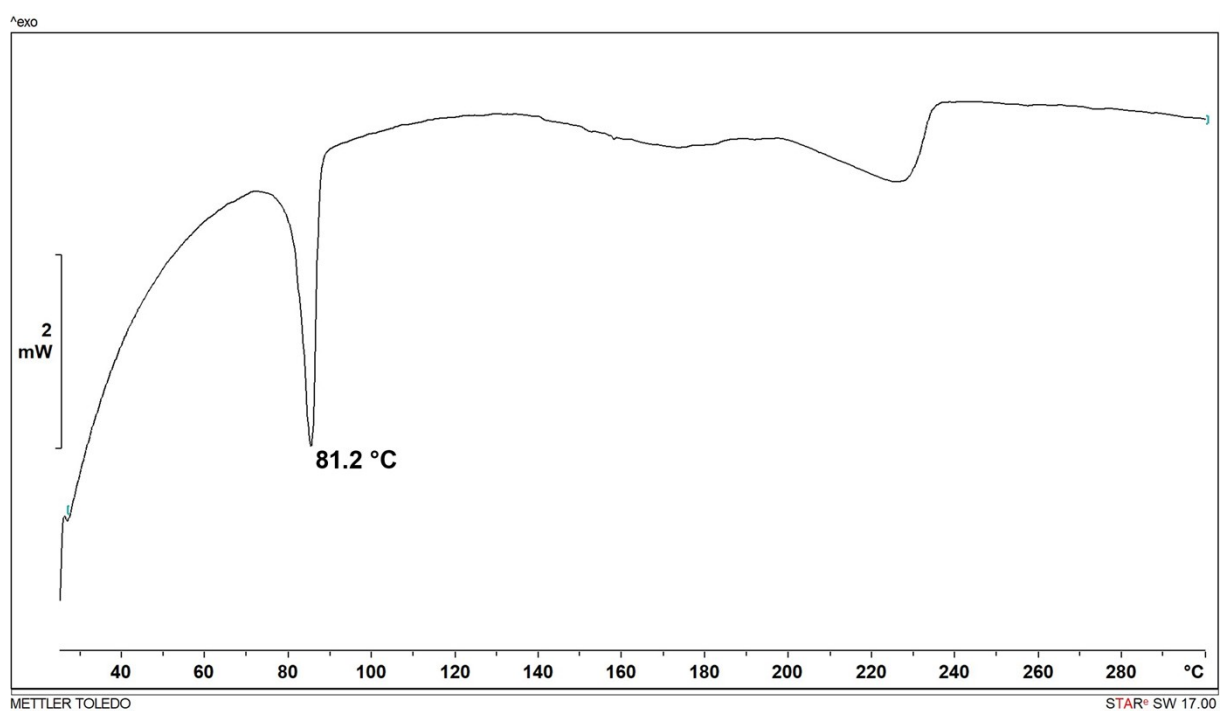

**Figure S23.** DSC curve of (tfox)(135tfib)

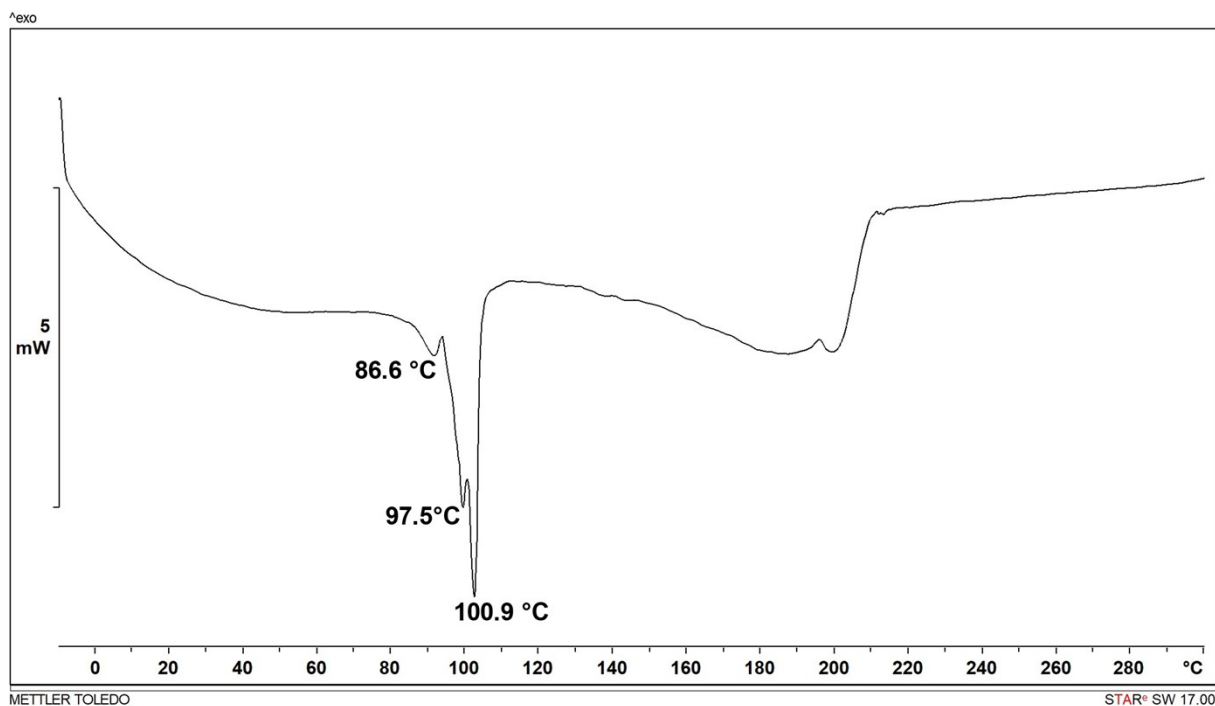

**Figure S24.** DSC curve of or crystal phase obtained by cocrystallized **fox** and **14tfib** in their respective stoichiometry.

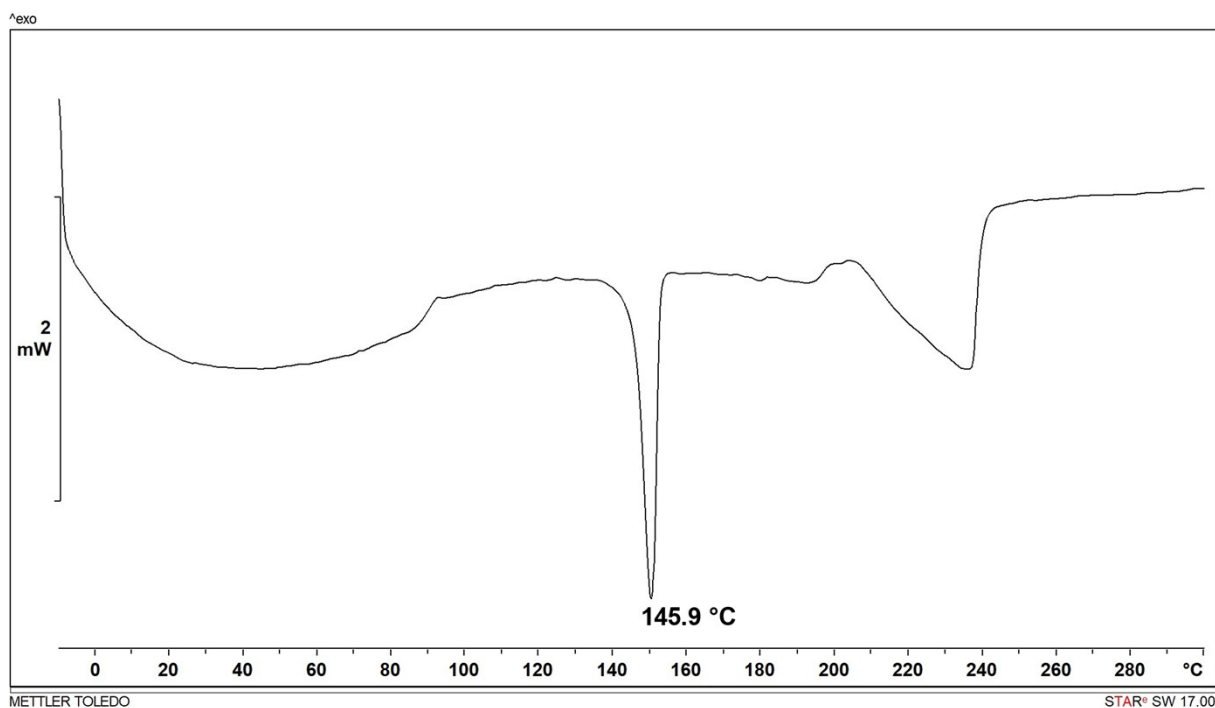

**Figure S25.** DSC curve of or crystal phase obtained by cocrystallized **fox** and **135tfib** in their respective stoichiometry.

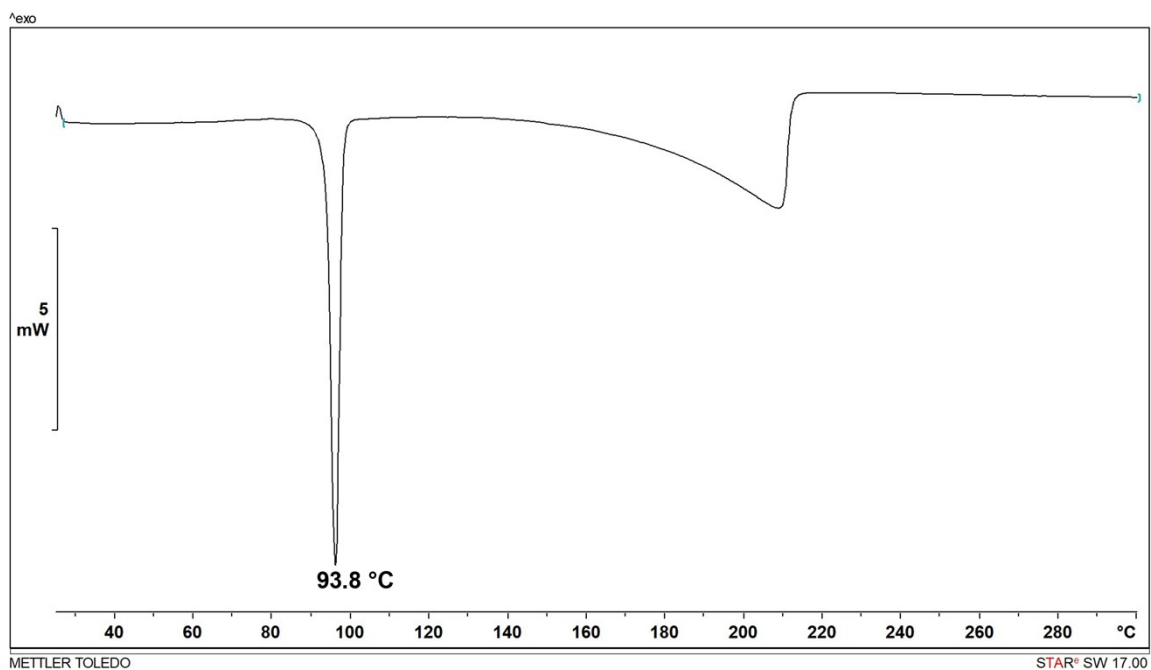

**Figure S26.** DSC curve of or crystal phases obtained by cocrystallized **pox** and **14tfib** in their respective stoichiometry.

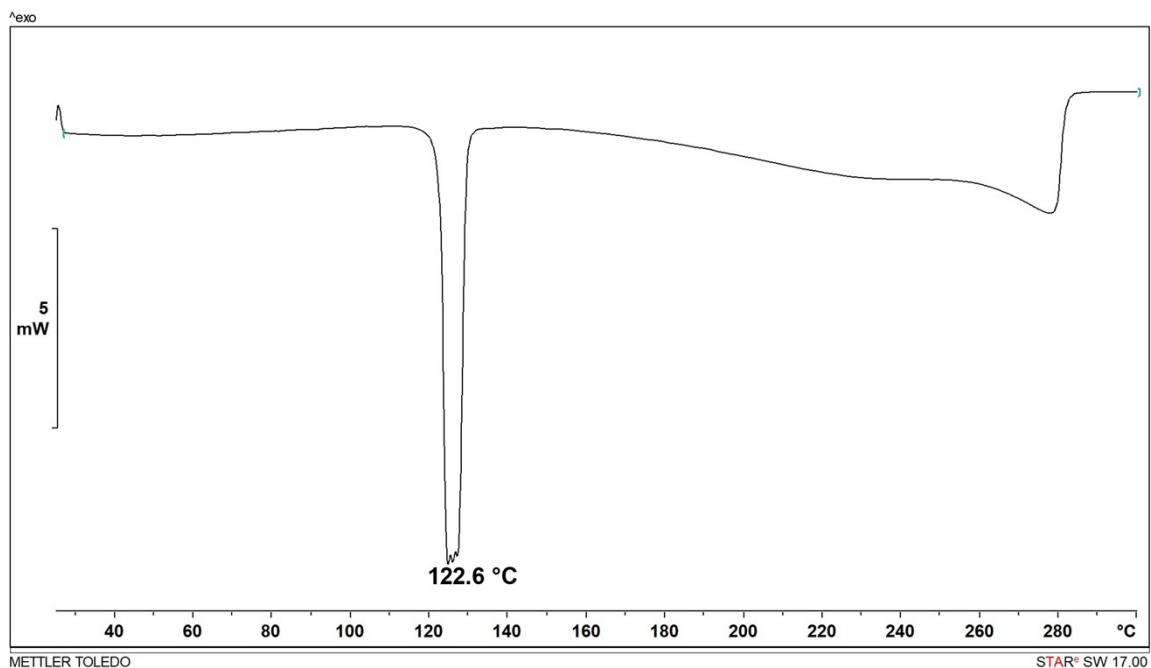

**Figure S27.** DSC curve of or crystal phases obtained by cocrystallized **fox** and **135tfib** in their respective stoichiometry



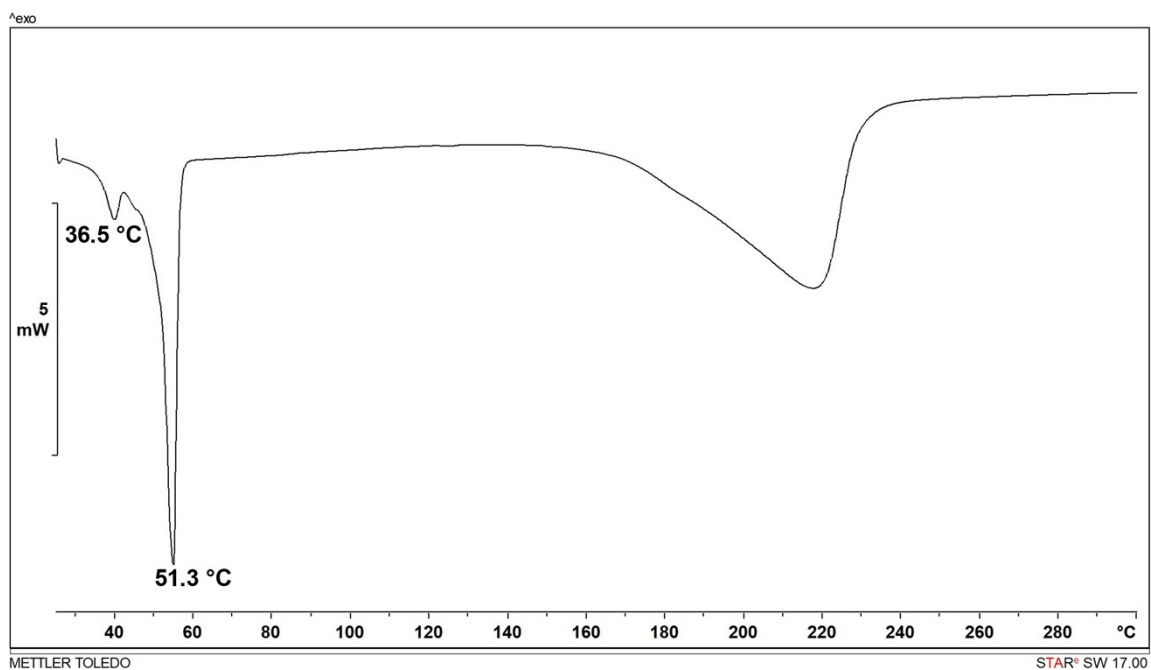

**Figur**

**e S28.** DSC curve of or crystal phases obtained by cocrystallized **pox** and **12tfib** in their respective stoichiometry.

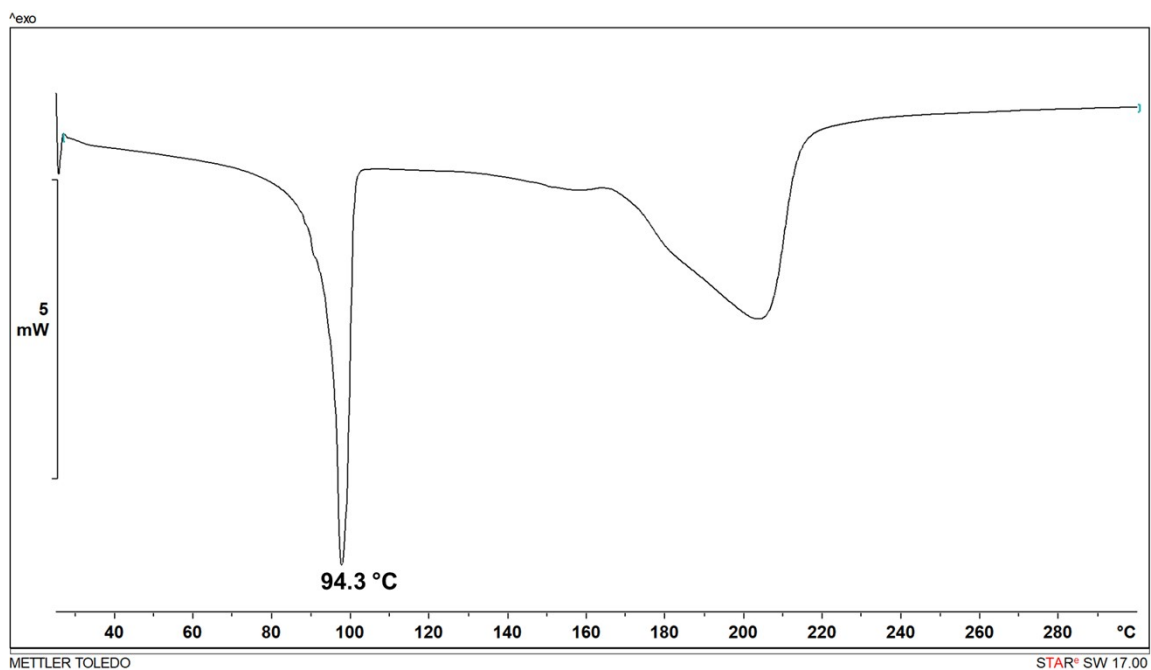

**Figure S29.** DSC curve of or crystal phases obtained by cocrystallized **pox** and **13tfib** in their respective stoichiometry

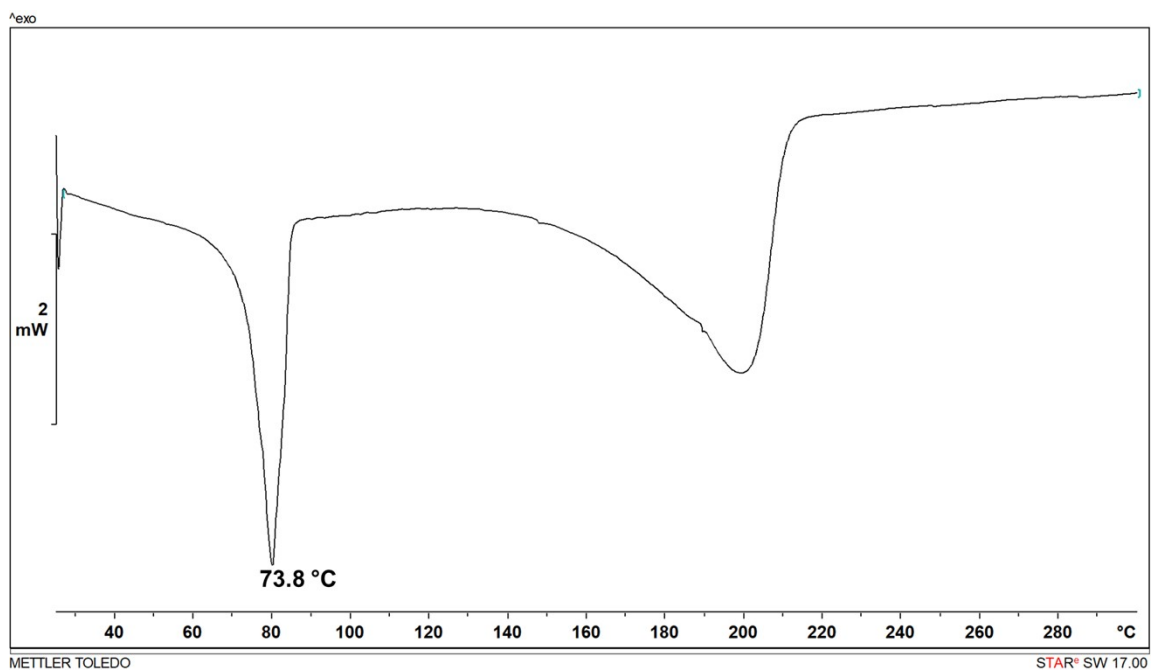

**Figure S30.** DSC curve of or crystal phases obtained by cocrystallized **tolox** and **14tfib** in their respective stoichiometry.

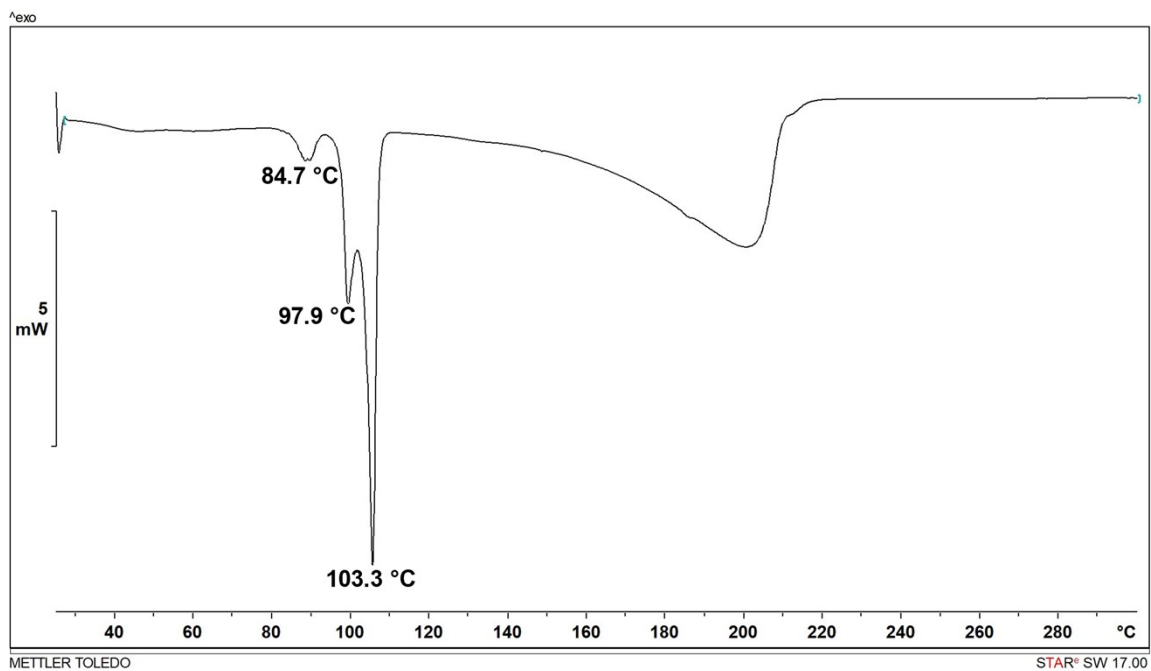

**Figure S31.** DSC curve of or crystal phases obtained by cocrystallized **nox** and **14tfib** in their respective stoichiometry.

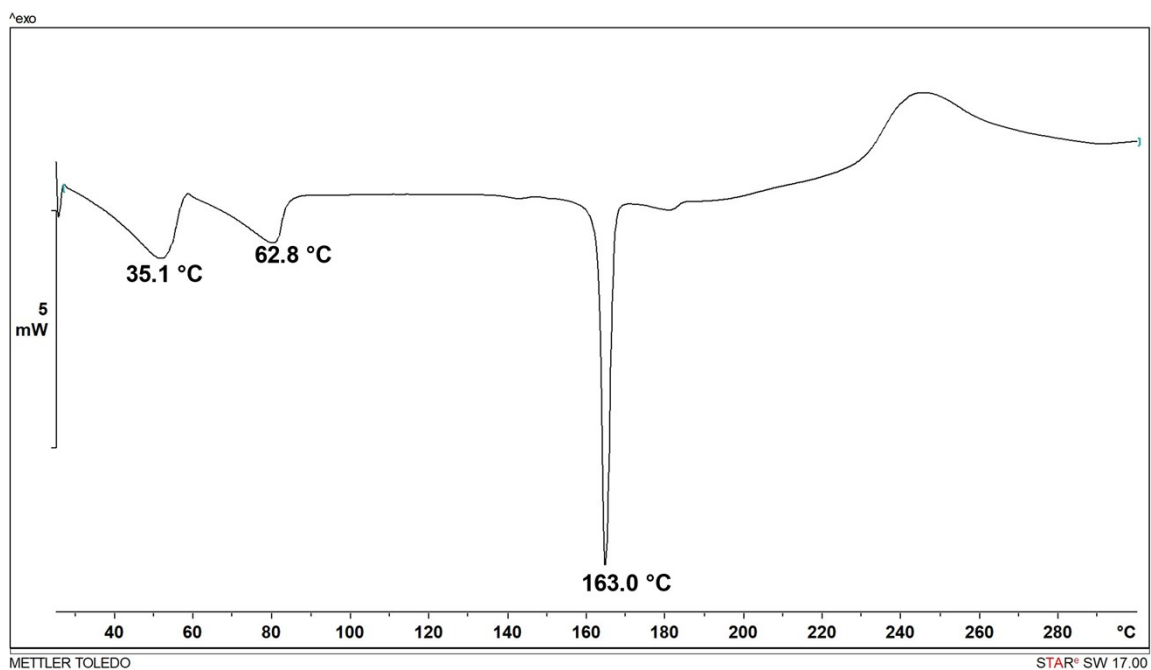

**Figure S32.** DSC curve of or crystal phases obtained by cocrystallized **nox** and **135tfib** in their respective stoichiometry.

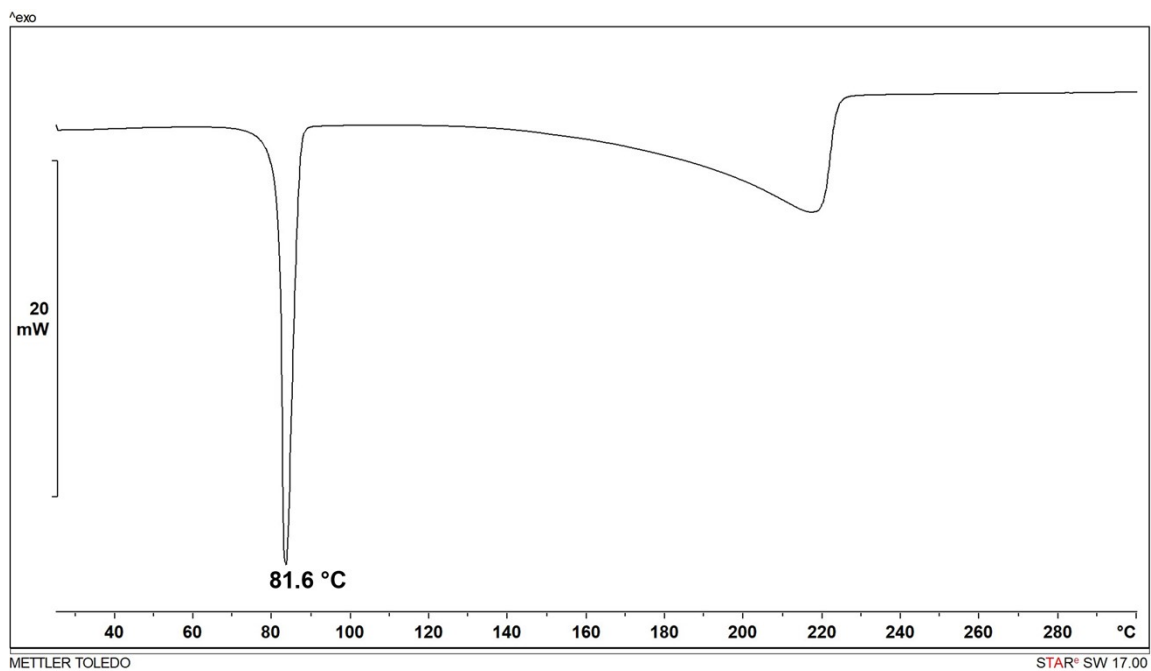

**Figure S33.** DSC curve of (phox)(14tfib).

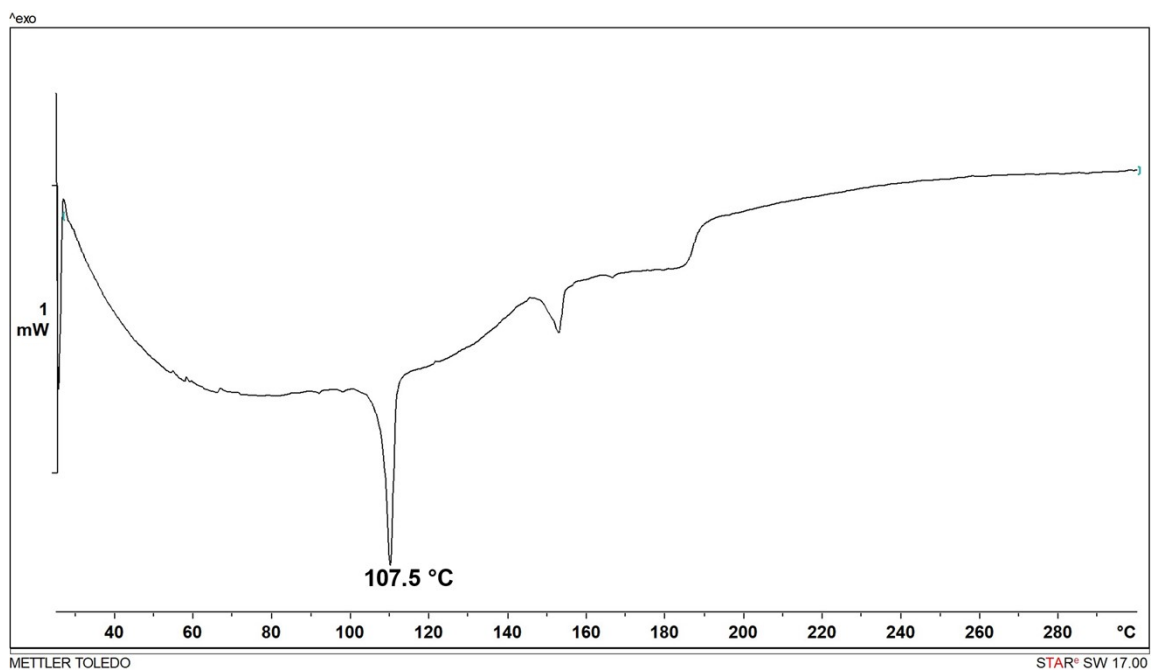

**Figure S34.** DSC curve of (phox)(135tfib).

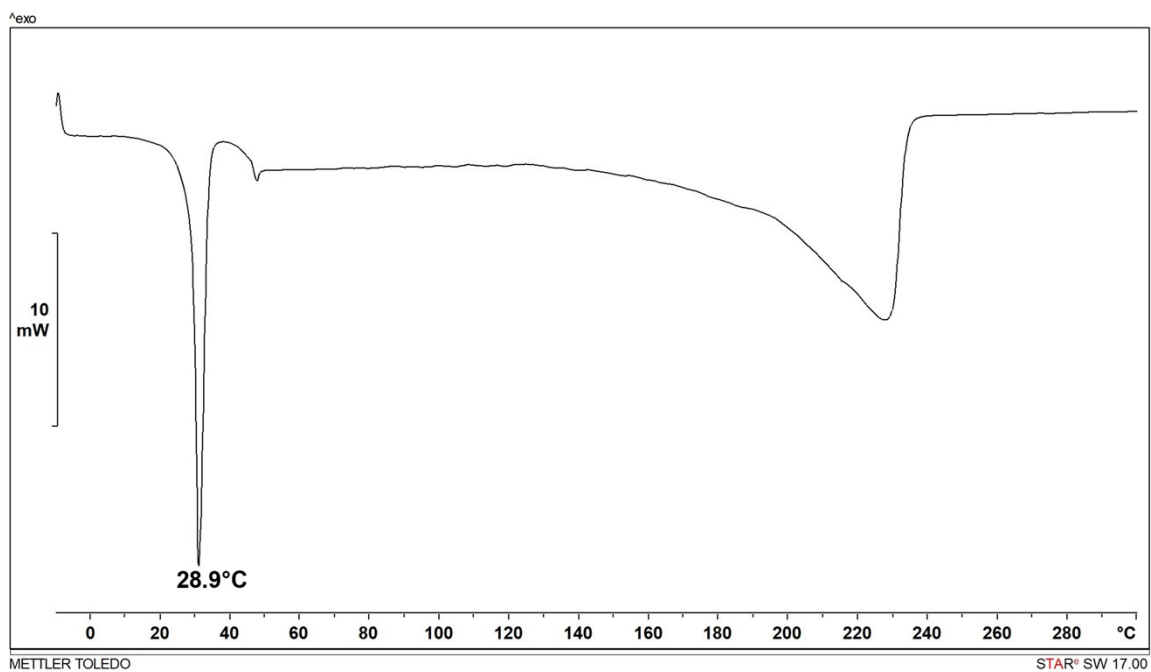

**Figure S35.** DSC curve of or crystal phases obtained by cocrystallized **phox** and **12tfib** in their respective stoichiometry.

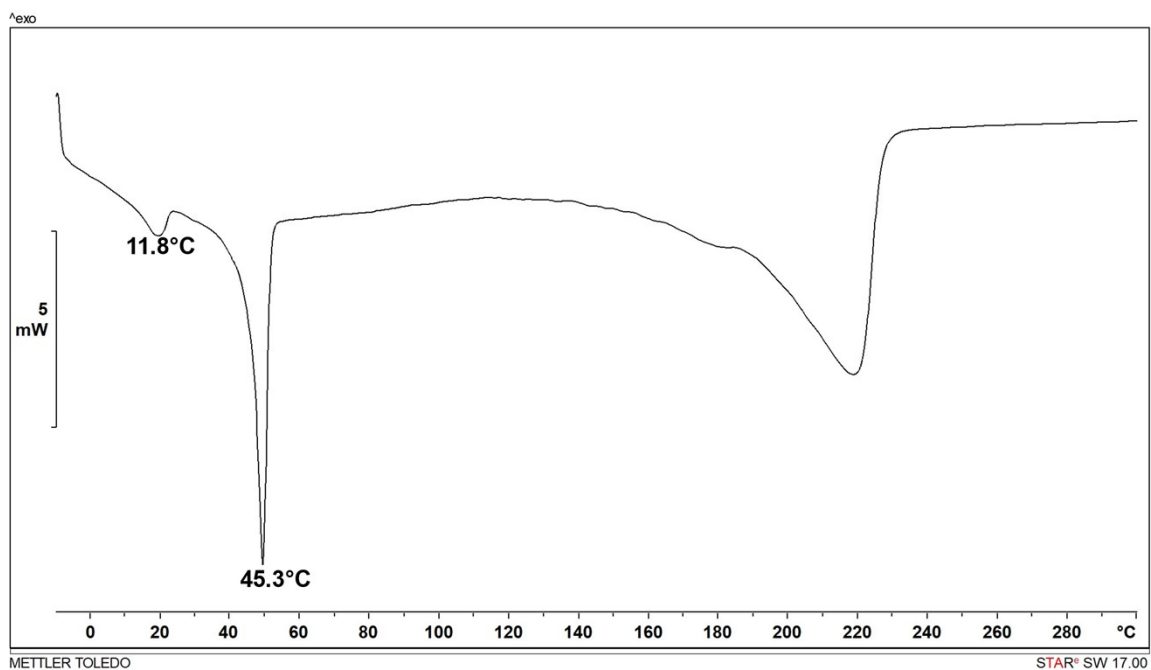

**Figure S36.** DSC curve of or crystal phases obtained by cocrystallized **phox** and **13tfib** in their respective stoichiometry

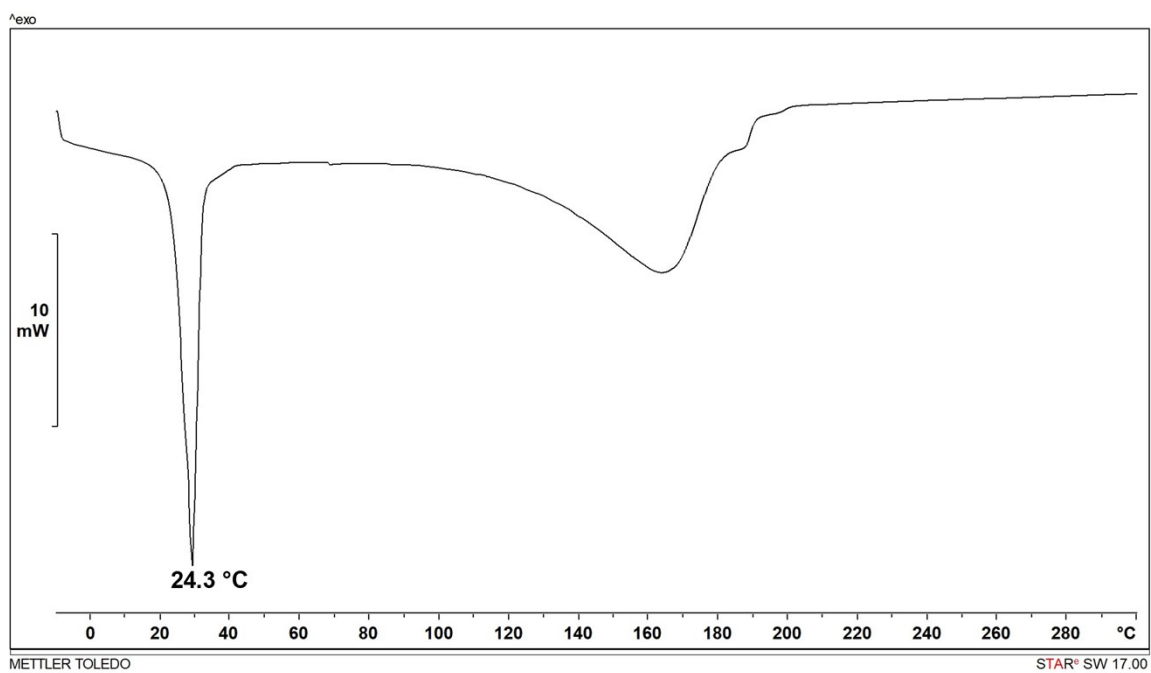

**Figure S37.** DSC curve of or crystal phases obtained by cocrystallized **box** and **14tfib** in their respective stoichiometry

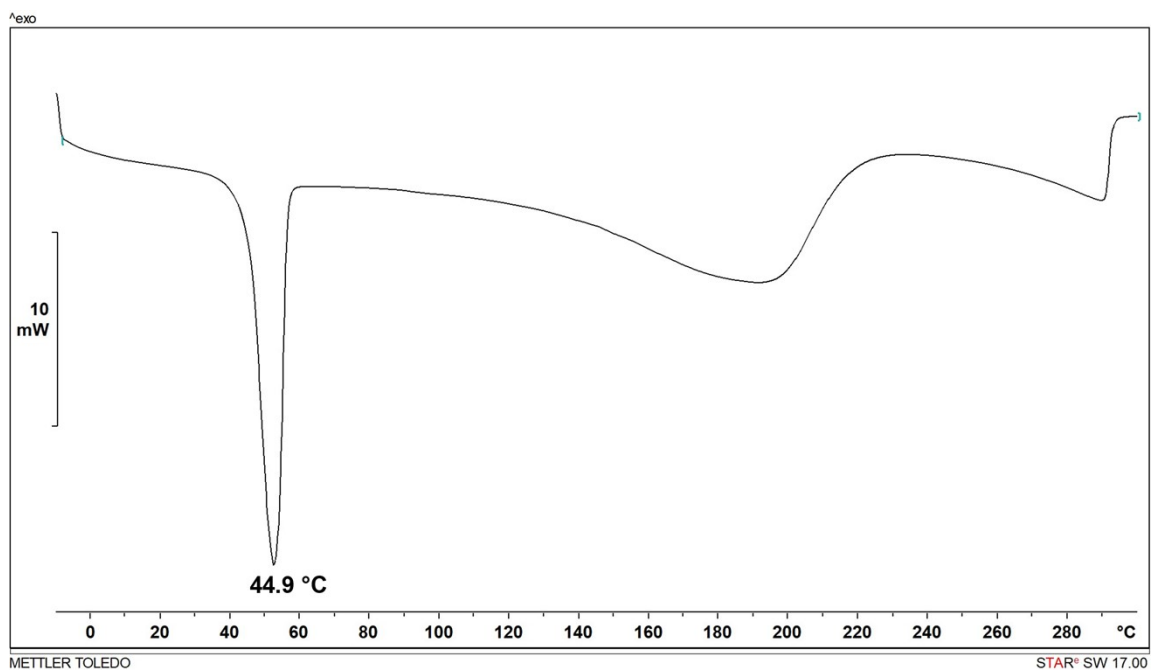

**Figure S38.** DSC curve of or crystal phases obtained by cocrystallized **box** and **135fib** in their respective stoichiometry

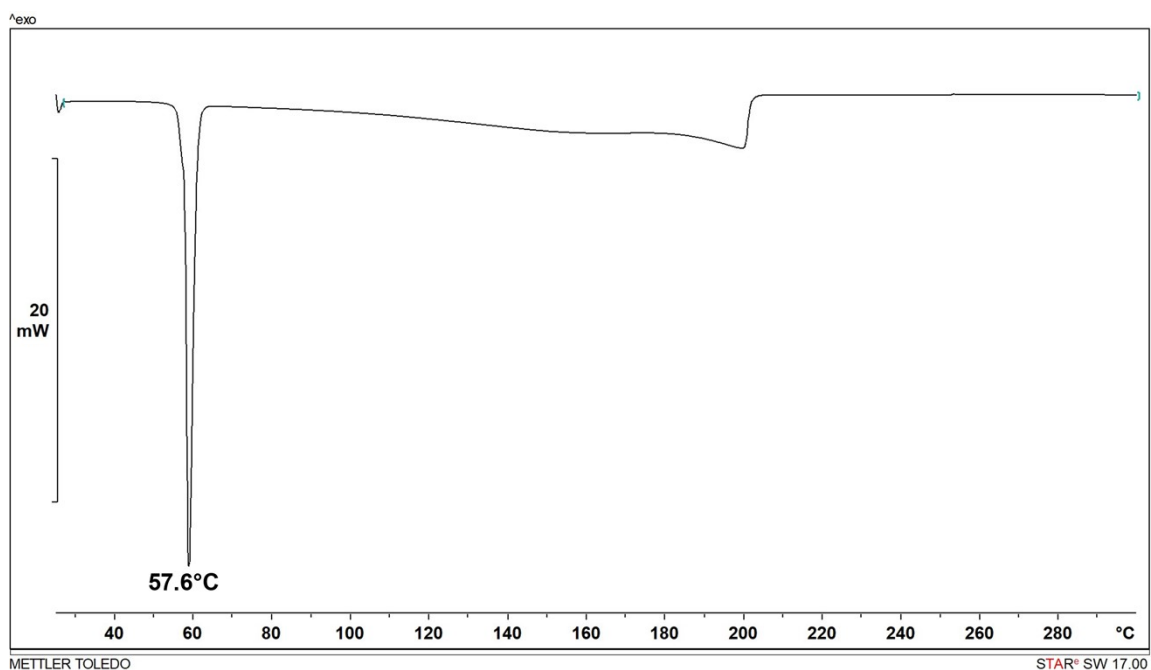

**Figure S39.** DSC curve of or crystal phases obtained by cocrystallized **box** and **12tfib** in their respective stoichiometry

## PXRD patterns

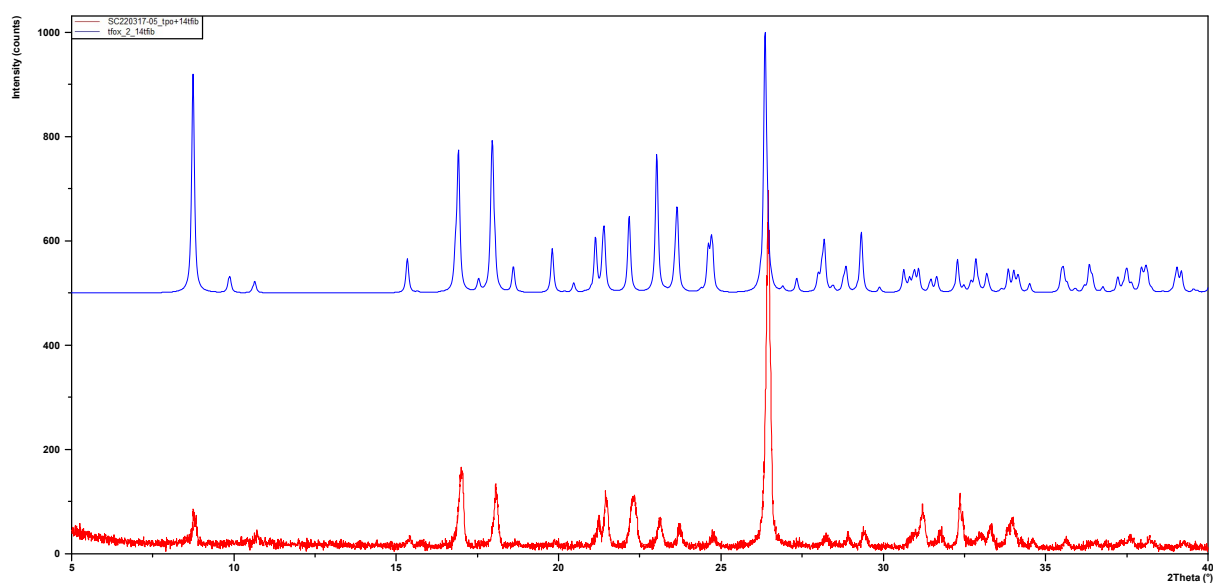

**Figure S40.** Calculated PXRD pattern from  $(\text{tfox})_2(\text{14tfib})$  single crystal data (blue) and diffractogram of the product obtained by crystallization (red)

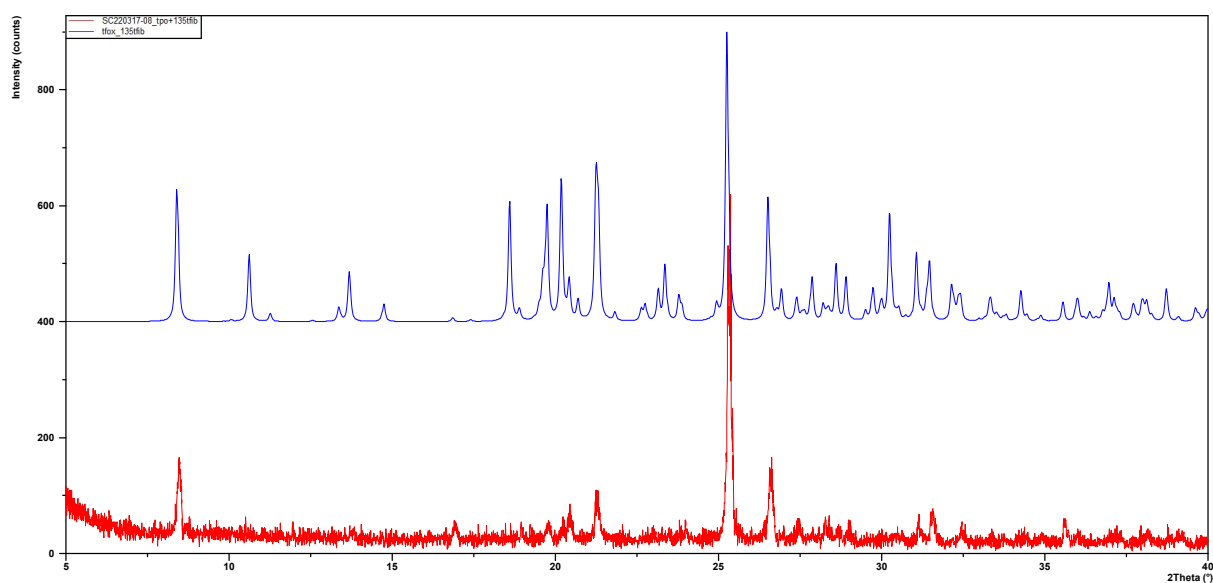

**Figure S41.** Calculated PXRD pattern from  $(\text{tfox})(\text{135tfib})$  single crystal data (blue) and diffractogram of the product obtained by crystallization (red)

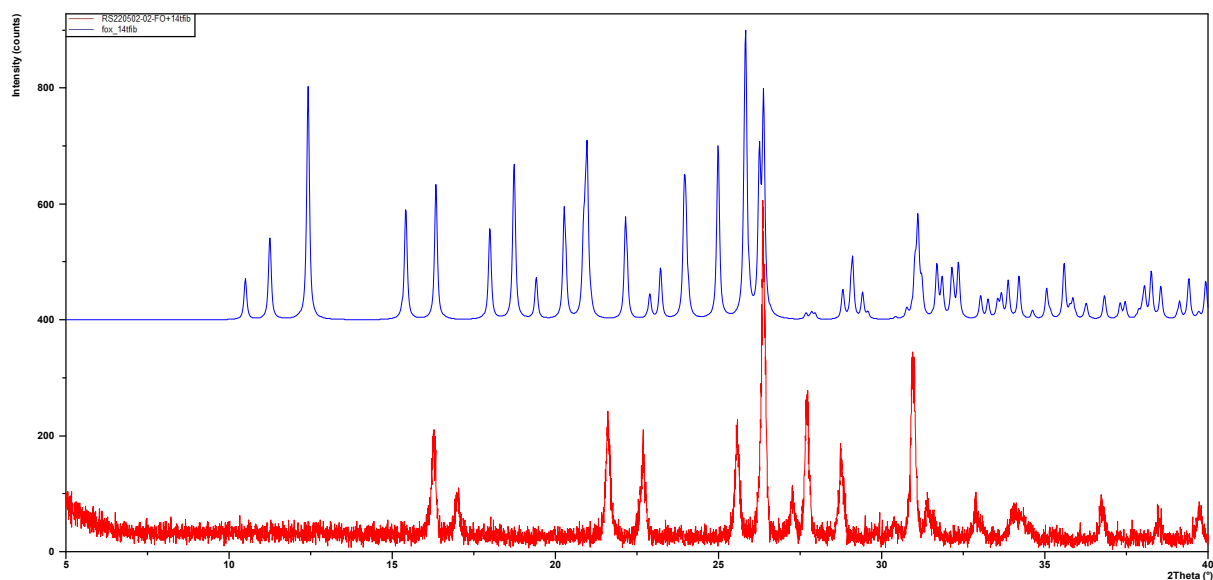

**Figure S42.** Calculated PXRD pattern from **(fox)(14tfib)** single crystal data (blue) and diffractogram of the product obtained by crystallization (red)

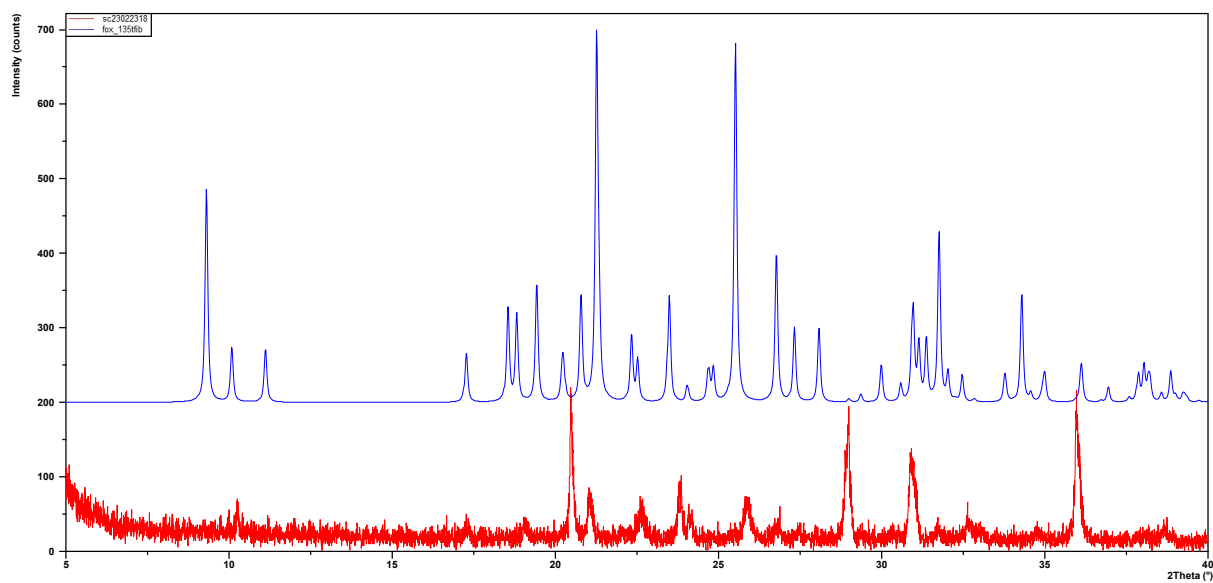

**Figure S43.** Calculated PXRD pattern from **(fox)(135tfib)** single crystal data (blue) and diffractogram of the product obtained by crystallization (red)



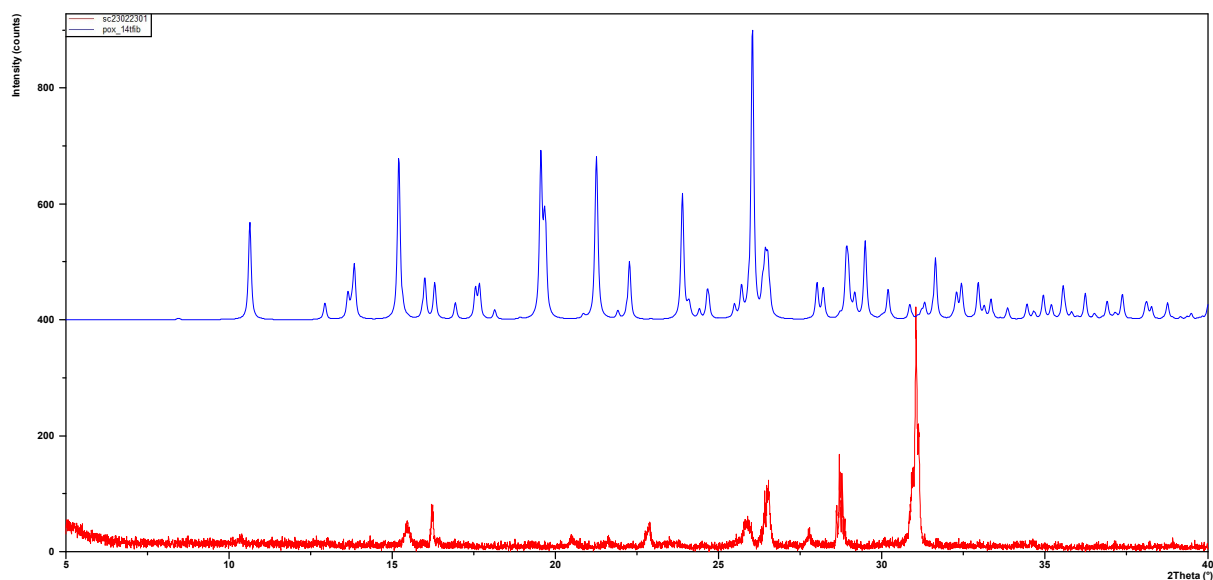

**Figure S44.** Calculated PXRD pattern from **(pox)(14tfib)** single crystal data (blue) and diffractogram of the product obtained by crystallization (red)

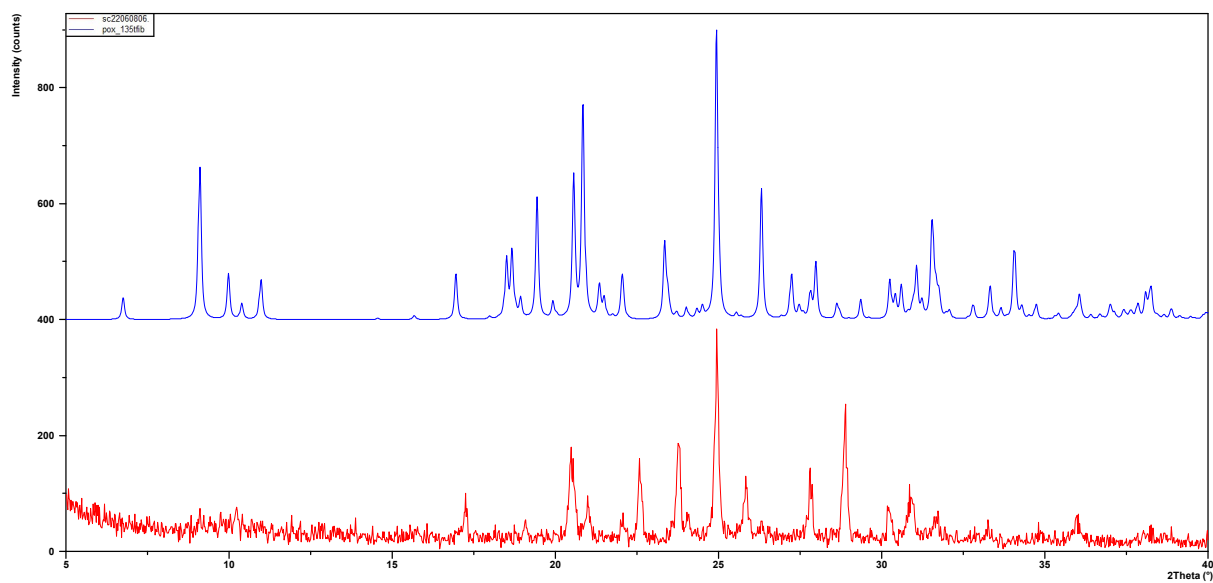

**Figure S45.** Calculated PXRD pattern from **(pox)(135tfib)** single crystal data (blue) and diffractogram of the product obtained by crystallization (red)

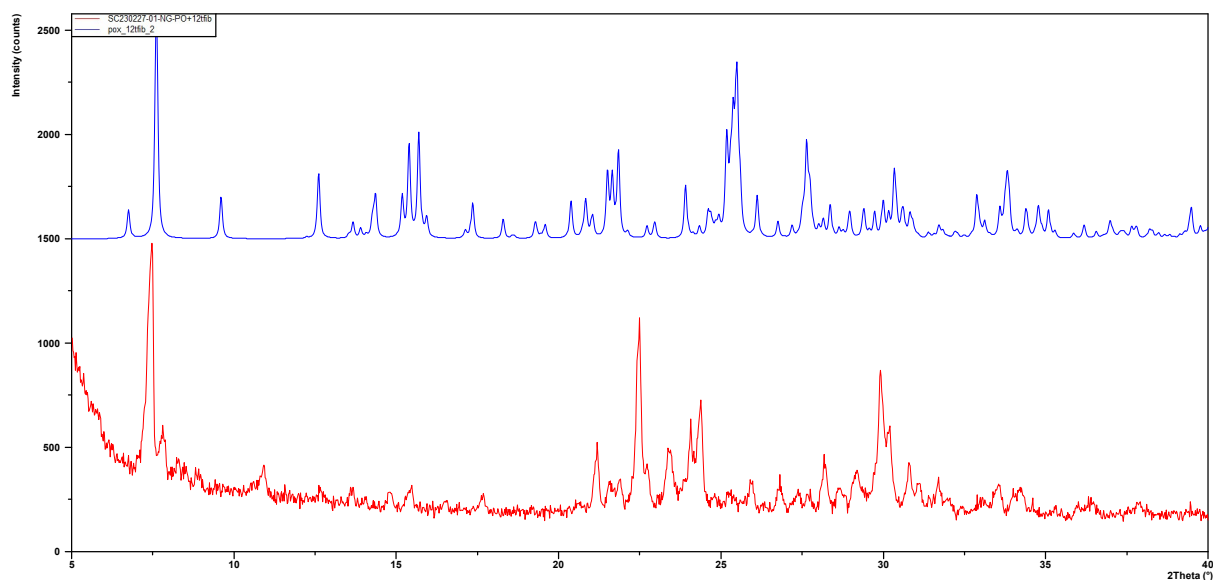

**Figure S46.** Calculated PXR pattern from **(pox)(12tfib)<sub>2</sub>** single crystal data (blue) and diffractogram of the product obtained by crystallization (red)

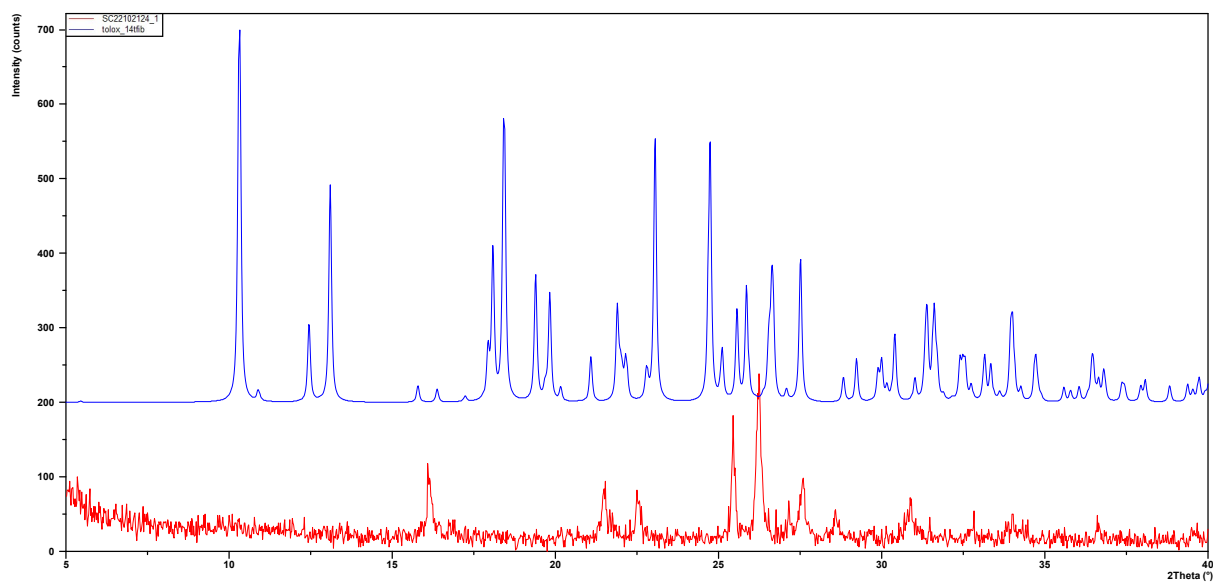

**Figure S47.** Calculated PXR pattern from **(tolox)(14tfib)** single crystal data (blue) and diffractogram of the product obtained by crystallization (red)

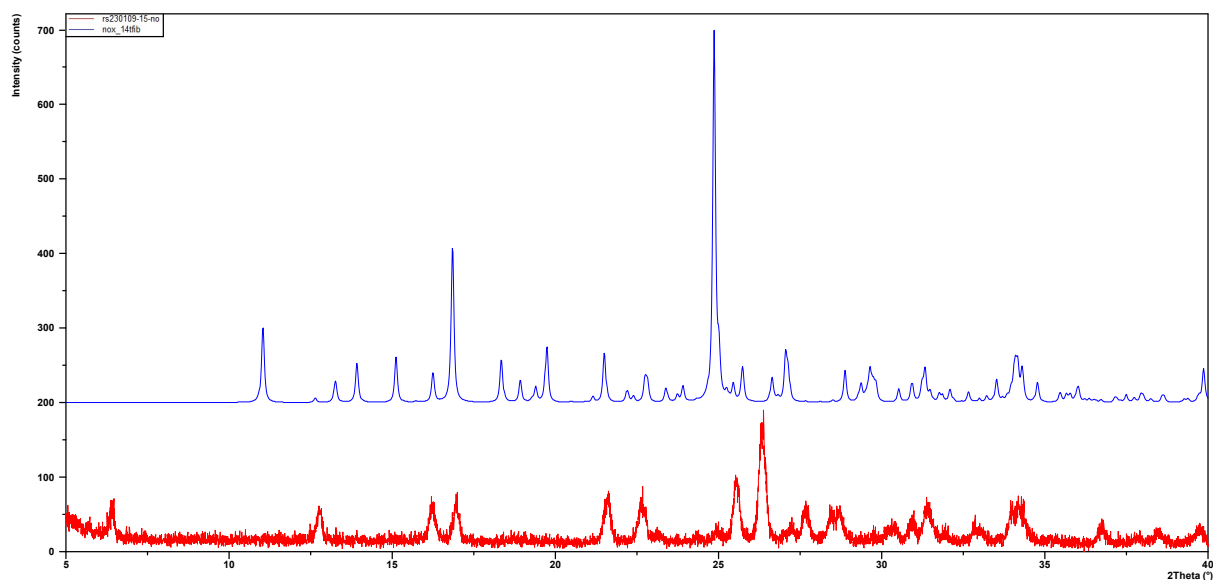

**Figure S48.** Calculated PXRD pattern from **(nox)(14tfib)** single crystal data (blue) and diffractogram of the product obtained by crystallization (red)

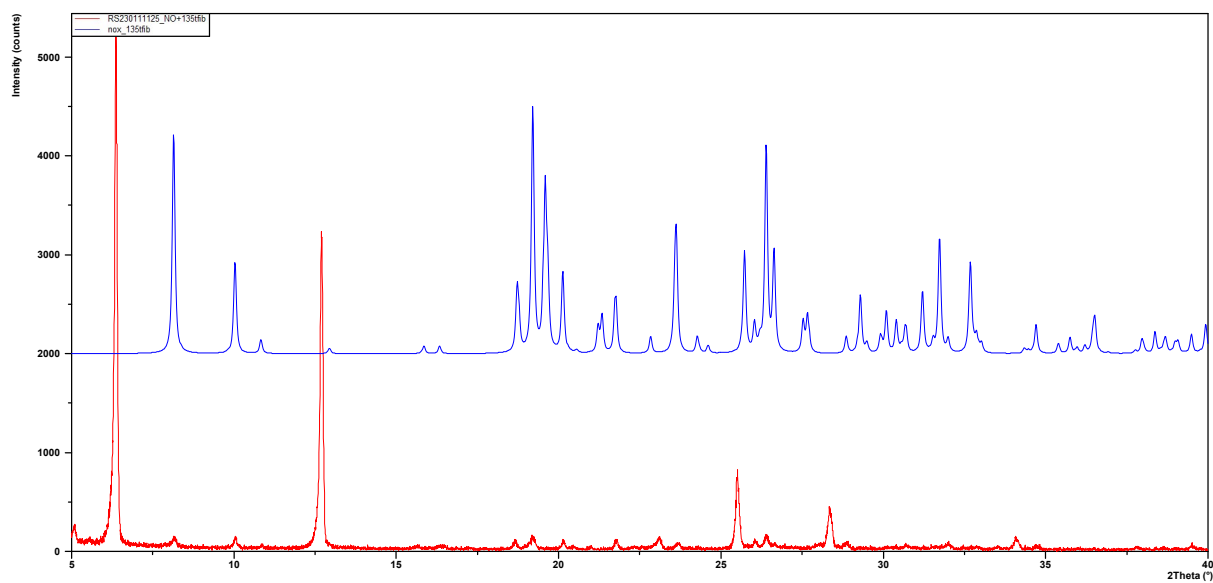

**Figure S49.** Calculated PXRD pattern from **(nox)(135tfib)** single crystal data (blue) and diffractogram of the product obtained by crystallization (red)

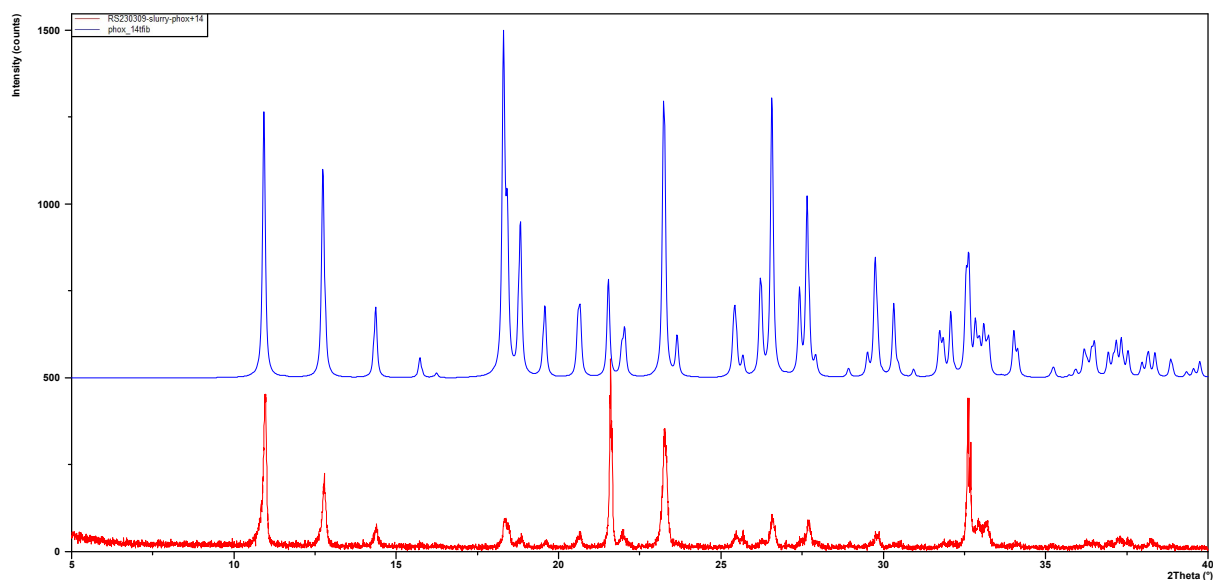

**Figure S50.** Calculated PXRD pattern from **(phox)(14tfib)** single crystal data (blue) and diffractogram of the product obtained by crystallization (red)

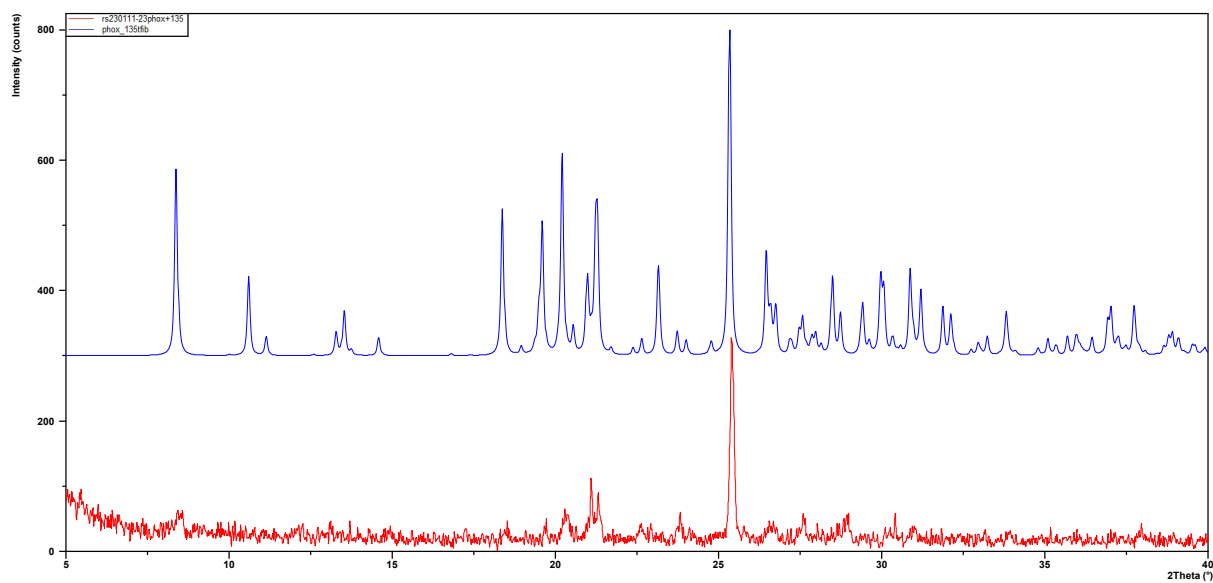

**Figure S51.** Calculated PXRD pattern from **(phox)(135tfib)** single crystal data (blue) and diffractogram of the product obtained by crystallization (red)

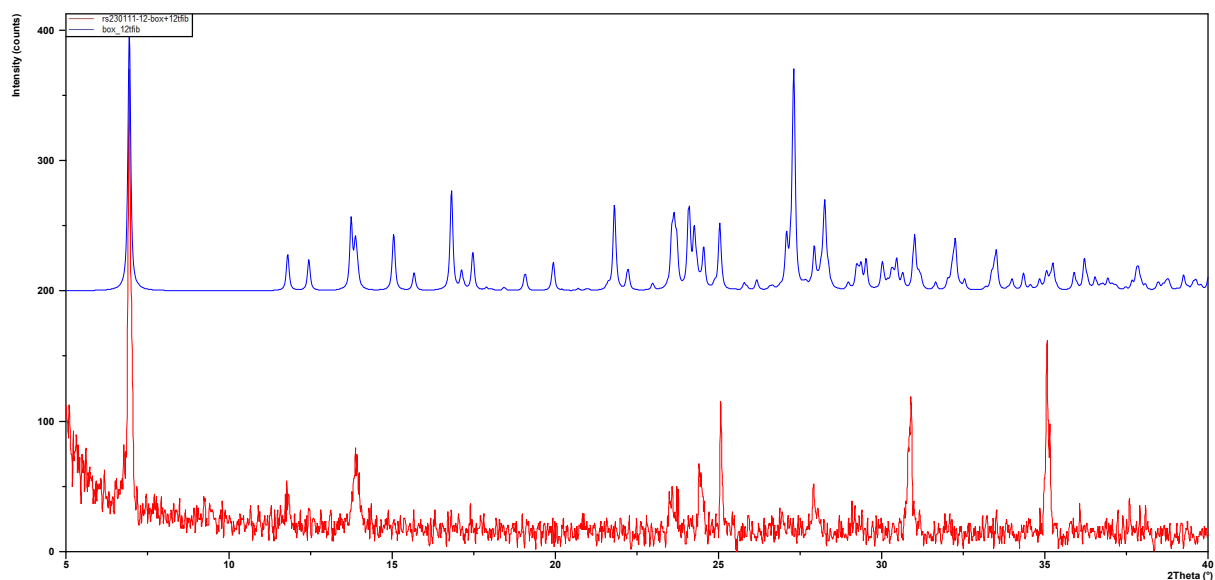

**Figure S52.** Calculated PXRd pattern from **(box)(12tfib)<sub>2</sub>** single crystal data (blue) and diffractogram of the product obtained by crystallization (red)

**Table S3.** Halogen bond energies between **14tfib** (model XB donor) and different acceptor sites on oxazoles used in study. Energies are BSSE corrected.

| acceptor     | $E_{\text{int}} (\text{I}\cdots\text{N}_{\text{oxazole}})$ | $E_{\text{int}} (\text{I}\cdots\text{O}_{\text{oxazole}})$ | $E_{\text{int}}(\text{I}\cdots\text{periphery})$ |
|--------------|------------------------------------------------------------|------------------------------------------------------------|--------------------------------------------------|
| <b>fox</b>   | -23.7                                                      | -10.08                                                     | -10.06                                           |
| <b>pox</b>   | -22.7                                                      | -10.46                                                     | -24.54                                           |
| <b>tfox</b>  | -23.79                                                     | -10.03                                                     | —                                                |
| <b>box</b>   | -23.53                                                     | -10.24                                                     | -14.96                                           |
| <b>nox</b>   | -20.99                                                     | -9.98                                                      | -15.41                                           |
| <b>tolox</b> | -21.57                                                     | -10.11                                                     | —                                                |
| <b>phox</b>  | -23.67                                                     | -10.99                                                     | —                                                |

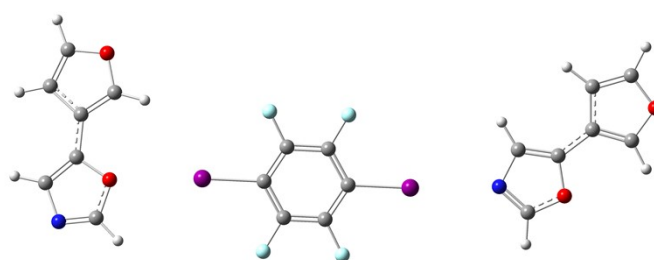

**Figure S53.** Optimized halogen-bonded trimer (**14tfib**)(**fox**)<sub>2</sub> including  $\text{I}\cdots\text{N}_{\text{oxazole}}$  and  $\text{I}\cdots\text{O}_{\text{oxazole}}$  halogen bonds.

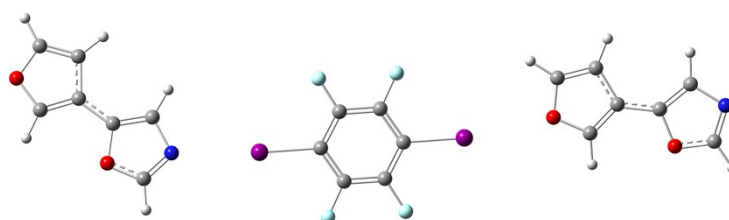

**Figure S54.** Optimized halogen-bonded trimer (**14tfib**)(**fox**)<sub>2</sub> including  $\text{I}\cdots\text{N}_{\text{oxazole}}$  and  $\text{I}\cdots\text{O}_{\text{furyl}}$  halogen bonds.

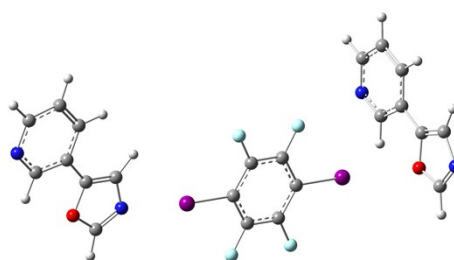

**Figure S55.** Optimized halogen-bonded trimer (**14tfib**)(**pox**)<sub>2</sub> including  $\text{I}\cdots\text{N}_{\text{oxazole}}$  and  $\text{I}\cdots\text{O}_{\text{oxazole}}$  halogen bonds.

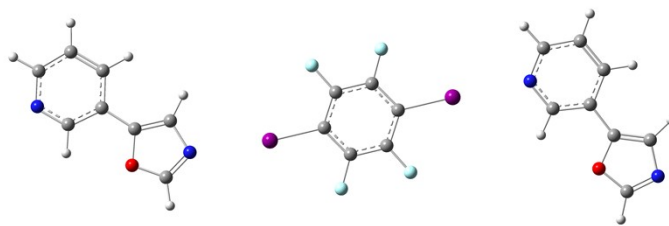

**Figure S56.** Optimized halogen-bonded trimer  $(14tfib)(pox)_2$  including  $I \cdots N_{oxazole}$  and  $I \cdots N_{pyridyl}$  halogen bonds.

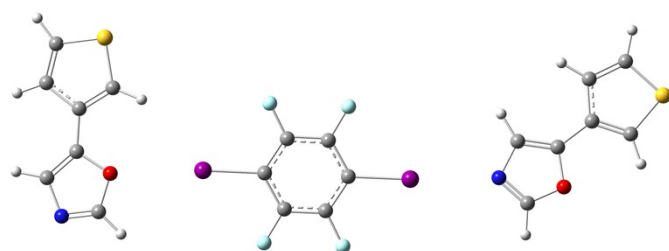

**Figure S57.** Optimized halogen-bonded trimer  $(14tfib)(tfox)_2$  including  $I \cdots N_{oxazole}$  and  $I \cdots O_{oxazole}$  halogen bonds.

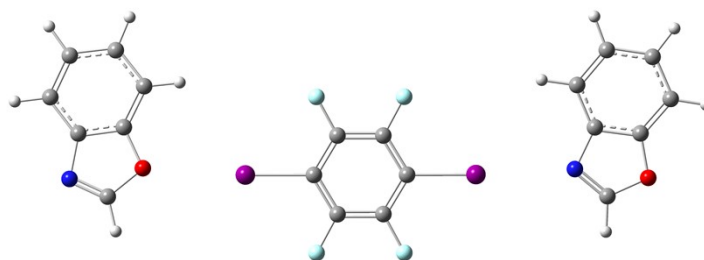

**Figure S58.** Optimized halogen-bonded trimer  $(14tfib)(box)_2$  including  $I \cdots N_{oxazole}$  and  $I \cdots O_{oxazole}$  halogen bonds.

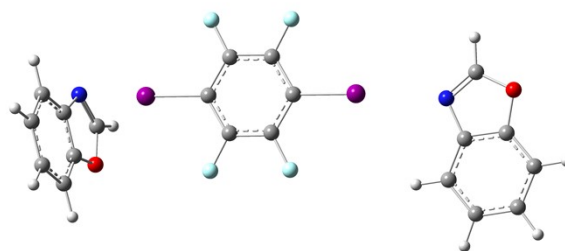

**Figure S59.** Optimized halogen-bonded trimer  $(14tfib)(box)_2$  including  $I \cdots N_{oxazole}$  and  $I \cdots \pi$  halogen bonds.

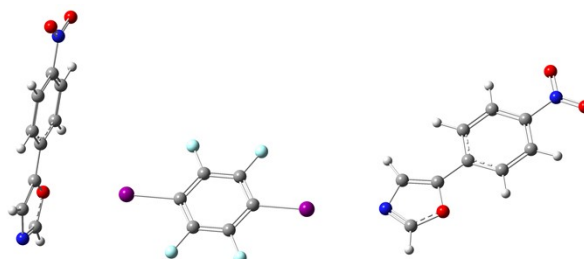

**Figure S60.** Optimized halogen-bonded trimer  $(14tfib)(nox)_2$  including  $I \cdots N_{oxazole}$  and  $I \cdots O_{oxazole}$  halogen bonds.

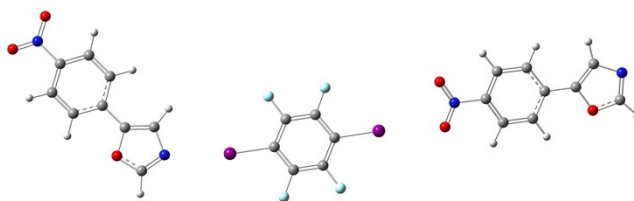

**Figure S61.** Optimized halogen-bonded trimer **(14tfib)(nox)<sub>2</sub>** including I $\cdots$ N<sub>oxazole</sub> and I $\cdots$ O<sub>nitro</sub> halogen bonds.

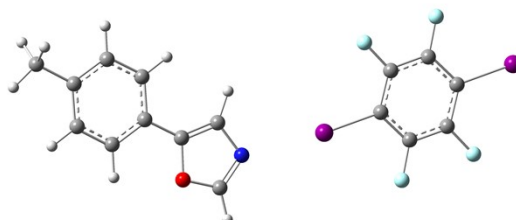

**Figure S62.** Optimized halogen-bonded trimer **(14tfib)(tox)** including I $\cdots$ N<sub>oxazole</sub> halogen bond.

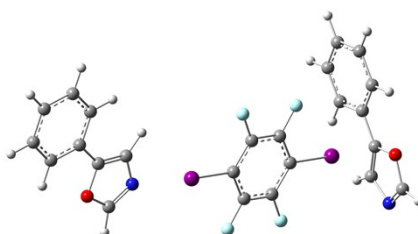

**Figure S63.** Optimized halogen-bonded trimer **(14tfib)(phox)<sub>2</sub>** including I $\cdots$ N<sub>oxazole</sub> and I $\cdots$ O<sub>oxazole</sub> halogen bonds.
